# Supplementary material for: Comprehensive Transcriptome Analysis of GS3 Near-Isogenic Lines During Panicle Development in Rice (Oryza sativa L.)
Source: Front Genet. 2022 Mar 1;13:857143. doi: 10.3389/fgene.2022.857143 (PMC8921255; doi:10.3389/fgene.2022.857143)
Supplement: Supplementary file 6 [file Table5.XLSX]

## Sheet: Sheet1
ID	NIL-GS3-S	NIL-GS3-M	NIL-GS3-L	NIL-gs3-S	NIL-gs3-M	NIL-gs3-L	Cluster
MSTRG.1.1	0	0	1.49279	0	0	4.20736	6
MSTRG.5.1	0.23771	0.695259	0.503092	0.454501	1.76806	0.577682	4
MSTRG.9.2	5.55927	7.28758	4.25642	8.23995	6.80062	5.56983	7
Os01t0100900-01	95.1386	112.752	125.607	132.582	164.376	189.659	6
Os01t0101150-00	6.53912	4.57877	3.51786	10.9943	6.08071	4.26558	7
Os01t0101200-01	0.263404	1.02721	0.495531	0.711031	0.522446	0.813149	5
Os01t0101300-01	15.9735	5.22276	11.3376	10.0923	5.68414	7.1907	8
Os01t0101600-01	1.12098	0.87621	0.213443	1.14558	0.871877	0.867016	2
Os01t0102000-01	123.829	115.15	150.236	67.3115	119.153	123.703	1
Os01t0102500-01	77.5008	72.0395	56.5569	70.4142	63.91	59.2335	8
MSTRG.21.1	6.11676	4.09455	3.42495	3.77761	0.881719	0.343083	8
MSTRG.22.2	3.0038	1.84449	1.33165	3.96413	2.97893	2.47279	7
MSTRG.23.1	1.3037	0.246855	1.3109	0.322663	0.675999	0.29931	1
MSTRG.24.1	6.21536	5.42151	5.84208	7.49078	8.74488	7.38291	9
MSTRG.25.2	5.56825	5.97391	3.65886	6.9717	3.00695	5.56959	2
MSTRG.26.1	2.65608	1.98643	0.832796	2.13169	2.19507	1.6952	8
Os01t0103600-02	115.727	125.212	112.433	113.3	123.231	104.282	5
Os01t0103600-01	12.1456	14.7537	6.95337	23.022	11.5012	12.2646	7
Os01t0103900-01	2.70664	2.255	0.412293	2.9475	0.842072	0.372841	2
Os01t0104350-00	21.276	50.8499	73.4603	16.3718	33.0813	154.856	6
MSTRG.40.2	1.46844	1.63243	1.00784	2.81056	1.34918	2.03455	7
MSTRG.41.1	7.86007	3.93238	1.94563	10.0504	2.05131	1.59925	2
Os01t0104900-01	76.1819	107.251	84.5033	93.1649	106.419	92.0572	4
Os01t0104900-02	0.830895	0.871351	0.526219	1.53898	3.57073	1.06877	9
Os01t0105800-01	25.6026	20.7534	14.3021	32.3869	18.0948	12.7355	2
Os01t0105900-01	250.289	347.643	351.981	274.767	543.829	624.429	4
MSTRG.52.1	10.0786	10.0386	7.21547	8.54295	11.9029	12.8512	4
Os01t0106300-01	68.3947	116.619	219.689	52.5235	205.359	172.431	3
Os01t0106500-01	0.308007	0.933134	0.92912	1.21969	0.282759	1.52465	6
Os01t0106800-01	633.043	630.914	549.494	650.677	614.722	552.812	2
Os01t0106900-01	0.501425	0.355269	0.47634	1.50394	1.65758	0.590818	9
MSTRG.62.4	1.97596	1.54738	1.6025	2.21519	3.0941	2.68026	4
Os01t0108000-01	0.483463	2.00402	0.947468	0.940523	0.954414	1.58468	3
MSTRG.63.11	0.527128	0.112489	0.206608	1.25474	0.921189	0.189585	7
Os01t0108200-01	5.80461	5.78654	3.84433	9.97269	5.88878	6.67551	7
Os01t0108400-00	0	1.45651	5.54337	0.34938	1.22321	1.4128	1
Os01t0109000-01	16.0882	18.9718	10.2731	15.1207	9.34773	15.4571	5
Os01t0109366-00	0	0.612769	0.605301	0.534101	0.539762	2.15977	6
Os01t0109432-00	9.88449	12.8395	8.26456	7.46633	14.6193	7.27917	4
MSTRG.73.1	4.49502	4.01302	3.0832	1.94324	3.14213	3.53608	5
MSTRG.76.1	0	4.70644	3.87423	0	3.12211	8.69317	3
Os01t0110100-01	6.76279	24.6349	27.956	4.77814	41.078	49.5059	3
Os01t0110200-01	9.00487	72.7479	108.342	0.909112	120.068	447.496	6
Os01t0110500-01	34.1042	19.6794	17.2576	37.9932	27.4748	12.2092	2
Os01t0110700-01	9.76192	1.91027	2.29631	11.1396	5.07104	1.29153	2
Os01t0111000-00	0	1.39391	2.06539	0.60748	0.613919	2.75857	3
Os01t0111100-01	10.2113	16.4795	30.416	8.66865	17.1592	44.22	3
Os01t0111200-01	361.894	253.472	237.832	410.266	259.571	219.411	2
MSTRG.88.1	1.26888	1.52076	2.04608	1.69442	3.05605	4.51597	6
Os01t0111700-01	0	0.475948	2.21154	0	0.576889	2.59218	3
MSTRG.92.1	1.56368	1.16334	0.377849	1.10506	1.70789	5.80879	6
Os01t0111800-01	1.18389	5.54746	8.58226	0	14.9323	20.1787	3
Os01t0111900-01	1.82786	5.52593	7.06696	3.73174	10.1441	34.5135	6
Os01t0112000-01	62.678	115.202	123.771	35.9904	123.734	167.565	3
Os01t0112050-01	1.73791	0.939632	0	2.78438	0.379638	0	2
Os01t0112400-01	3.20206	483.283	878.695	3.17001	530.705	787.299	3
Os01t0112500-01	3.47824	8.35039	6.86578	12.7374	5.69853	10.8308	7
MSTRG.103.1	2.77813	3.93672	1.95989	2.57283	0	1.22753	5
MSTRG.104.1	8.10653	9.1193	4.14669	6.35885	3.71049	3.85008	5
MSTRG.106.1	0.602326	0.374898	0.196735	1.34535	0.877168	0.394145	7
MSTRG.109.4	1.82512	1.11413	0.806185	2.42773	1.24719	0.981715	2
Os01t0113500-01	1.2272	0.365203	1.06755	0.848847	0.857844	0.772398	8
Os01t0113800-01	4.63071	3.37469	3.05804	3.71021	4.72357	3.97528	9
MSTRG.117.1	1.13852	1.2148	3.30135	1.0728	1.12379	3.57607	3
Os01t0114300-01	1.01165	0.547373	0.270351	1.99315	1.48478	0.661535	7
MSTRG.125.2	25.8805	18.3368	13.3202	37.5347	34.5815	30.2036	9
Os01t0114900-00	8.86428	7.61907	3.00666	7.36943	7.40349	5.62206	8
Os01t0115600-01	13.6986	9.31411	5.66126	14.8147	10.3374	7.97803	2
MSTRG.134.1	2.26655	0.7874	0.767235	6.73159	0.783506	0.623311	7
MSTRG.152.3	6.30919	4.17234	1.37383	7.26608	4.24414	6.12744	2
Os01t0117100-00	0.649084	0.632819	0.616612	1.10315	0.858278	0.55761	7
MSTRG.166.1	4.81421	2.85569	1.61734	8.91688	2.99784	2.67134	2
Os01t0118000-01	264.018	389.369	368.275	228.532	323.605	497.755	3
Os01t0118400-01	1.05349	4.47851	13.7251	0.947929	7.73809	15.3854	3
MSTRG.175.1	1.26214	3.2885	2.22094	2.29306	4.25391	2.02837	4
Os01t0118700-01	13.3835	18.0224	28.2682	8.3476	18.5516	23.3868	1
Os01t0119050-01	56.0409	102.502	98.8438	57.4266	46.9343	111.958	3
MSTRG.181.1	0.213308	0.906796	2.05428	0.181264	1.05771	5.27805	6
MSTRG.182.1	7.38363	13.372	9.61517	8.02676	6.77846	20.5715	6
Os01t0119500-01	8.86883	12.3048	8.10111	6.37707	7.10397	13.3332	3
Os01t0119800-01	7.90212	9.33134	5.28487	5.59588	6.96594	6.40124	5
MSTRG.185.3	7.48534	4.75509	4.2651	6.95994	4.35212	2.12136	8
MSTRG.186.1	8.02089	5.72198	3.3727	8.83725	4.32891	4.33133	2
Os01t0120700-01	24.6245	23.8241	17.1009	31.6046	30.4787	17.9447	9
ENSRNA049471381-T1	56.7982	57.8118	48.712	56.7834	63.1238	78.2422	6
MSTRG.195.1	0.287155	0.217491	1.16644	0.284281	0.527234	0.473812	1
MSTRG.196.1	0.356981	0.465056	0.269213	1.78355	1.32457	0.5737	7
Os01t0122534-00	9.49055	4.23902	3.14052	4.36221	4.21805	4.47417	8
Os01t0122701-00	1.03726	0	0	1.92122	0	0.800526	2
MSTRG.204.1	4.66364	1.7427	2.10488	4.70718	0.951413	1.95805	8
MSTRG.205.1	4.71299	5.35841	5.29311	8.65447	3.93333	12.1974	6
MSTRG.206.1	0	0	1.13782	0	0	0.514474	1
Os01t0123800-00	0.255744	1.06614	3.34302	0.253184	0.939121	7.73101	6
Os01t0124100-01	5.74681	3.93701	86.3569	4.06032	0.662189	0.263399	1
Os01t0124200-02	31.5195	7.54348	264.726	31.8368	3.2696	1.80236	1
Os01t0124401-01	12.2901	9.09696	168.799	6.08355	6.21848	22.4287	1
Os01t0124900-00	21.5449	22.1904	17.7325	17.6551	15.2617	20.0593	5
MSTRG.214.1	4.69728	4.57957	2.58501	2.4858	8.64418	1.55366	9
MSTRG.215.1	0	0	0	0	1.48037	0	4
Os01t0125550-01	2.79706	3.58781	3.71442	4.553	5.01813	5.28461	4
MSTRG.217.1	8.53491	8.16403	5.66026	7.60591	7.96743	9.10777	6
Os01t0125800-01	19.9793	31.6356	19.0597	18.2323	16.1602	30.7972	3
Os01t0126100-01	1.45095	0.863577	0.416591	0.66418	0.507125	0.634119	8
Os01t0126600-01	11.4254	9.77333	6.75053	10.1826	9.32674	12.904	6
Os01t0127300-01	38.4652	36.3305	47.3816	36.4181	50.1388	61.9342	6
Os01t0127500-01	16.5396	776.82	780.869	3.34642	797.173	783.056	3
Os01t0127600-01	31.9771	4.92839	97.2521	34.4063	1.07554	0	1
Os01t0127700-01	0.456377	2.2511	1.66844	0.438976	0.75414	1.35546	1
MSTRG.238.1	1.30364	2.07032	1.46991	1.40979	0.987164	1.48222	5
Os01t0128300-00	4.47247	6.76052	5.70719	9.48213	4.41459	1.75599	7
Os01t0128700-01	11.5871	9.35892	11.1784	13.653	19.413	7.11489	9
MSTRG.241.1	5.71895	2.09909	0	5.10283	0.56716	0	8
MSTRG.242.1	5.52905	7.22277	5.41659	5.28577	5.63856	9.46774	6
Os01t0129200-01	1.57553	1.13578	0.385956	1.44241	0.794883	0	8
Os01t0129500-02	20.7123	23.5991	13.5606	18.7628	23.9168	21.4935	4
Os01t0129800-01	8.3506	13.6086	25.7166	13.4889	12.5084	20.8544	1
Os01t0130000-01	3.94389	2.84485	4.64026	3.90441	5.51711	7.24364	6
MSTRG.249.1	9.48142	24.9517	31.0024	4.46881	7.16412	42.2931	3
Os01t0130400-01	188.205	143.58	166.552	155.028	104.789	49.2569	8
Os01t0130500-01	1.19364	0.791054	0.606077	1.77254	1.4236	0.548083	7
Os01t0130900-01	139.856	165.544	128.64	139.805	94.4451	155.332	5
Os01t0131300-01	260.466	529.277	522.867	361.187	384.17	680.963	3
Os01t0131800-01	241.246	215.719	153.741	215.85	171.5	177.459	8
Os01t0131900-00	3.05838	5.43882	0	1.86665	0	0	5
Os01t0132000-01	70.7982	61.4507	443.072	48.991	24.022	29.9745	1
Os01t0132200-01	31.254	45.8861	29.6905	19.7717	45.8171	32.9652	4
Os01t0132400-01	14.8718	61.0568	7.28188	9.34849	29.5674	10.3258	5
Os01t0132500-01	21.8082	21.0056	19.2777	14.4217	16.4721	19.8635	5
Os01t0132766-01	11.2485	10.5686	7.43355	8.58113	15.2779	16.6393	4
MSTRG.266.1	6.5445	0.786312	0	0.998593	3.22991	1.71301	8
Os01t0132800-01	0.274569	1.07076	0.7825	1.16661	0.471591	0.943499	5
MSTRG.268.1	41.1827	49.4237	29.9233	43.5829	20.761	13.3118	5
Os01t0133100-02	1.70154	2.21668	2.4479	1.82488	1.05225	0.520862	5
Os01t0133200-01	191	116.255	53.6291	133.531	46.199	17.0233	8
MSTRG.271.3	0.652625	1.94214	1.11039	1.5269	1.57466	1.1736	5
Os01t0133832-00	290.071	121.008	111.159	310.747	141.55	52.6483	2
MSTRG.274.1	280.561	125.516	93.4569	205.455	73.0519	74.0803	8
Os01t0133900-00	12.7529	12.1638	5.16373	21.2045	5.93912	6.43093	2
Os01t0134500-01	833.955	621.309	482.871	813.752	681.842	246.537	2
Os01t0134700-01	4.1581	4.77585	12.9789	2.18738	3.45759	6.82417	1
Os01t0134850-00	0.181824	0.275426	1.64545	0.349783	0.377119	1.71764	3
MSTRG.281.1	2.09837	3.28037	9.49475	3.02754	11.1227	2.59676	4
MSTRG.282.3	0	0.284249	0.13052	0.125511	0.537615	1.16427	6
MSTRG.284.1	35.7987	38.7725	33.173	31.0579	24.8093	30.2968	5
Os01t0135700-01	62.812	230.433	210.626	68.7748	38.1001	69.7283	1
MSTRG.286.1	2.34994	10.0296	3.93578	4.57171	1.48198	6.68914	5
Os01t0136200-01	4.978	7.52467	6.81636	3.94539	19.2548	5.2219	4
Os01t0136300-01	12.108	19.8148	22.3715	12.4939	27.6874	25.2611	4
MSTRG.292.1	19.7839	30.2691	26.4208	20.9772	18.3582	29.8733	3
MSTRG.293.1	1.05853	26.7577	71.7123	0.509086	33.344	73.9976	3
Os01t0136450-00	2.29006	7.59108	8.38075	3.39332	4.08797	11.4105	3
Os01t0136700-01	0.449366	3.21277	3.45194	0.190931	1.26266	1.85317	1
MSTRG.300.1	5.80561	7.84648	2.59293	7.44113	4.39645	4.86275	5
MSTRG.301.1	1.25787	0.891223	0.531085	0.950141	0.960211	0.617549	8
Os01t0137200-00	1.21857	1.17128	1.94373	0.371872	0.819723	2.13024	3
MSTRG.307.2	1.72627	1.43929	1.7358	2.98881	1.96924	1.46768	7
Os01t0137300-01	5.37295	3.88023	3.87538	7.52514	6.31521	2.76445	7
Os01t0137950-01	1.29659	0.982032	0.329174	1.24715	0	0.893028	8
Os01t0138100-01	0.317997	0.687723	0.913019	1.09978	1.66716	0.833857	9
Os01t0138600-01	5.3667	4.02	2.76881	7.81801	2.41723	1.47923	2
Os01t0138900-01	47.2212	36.1375	47.4818	53.8211	31.673	23.3627	2
Os01t0139700-01	51.2497	60.6387	61.92	53.5402	48.9023	45.7698	1
MSTRG.326.1	3.18411	1.80873	2.45853	2.36418	0	1.87997	8
Os01t0140100-01	62.4931	105.571	110.655	41.8777	34.8164	76.9493	1
MSTRG.330.1	655.068	472.023	390.421	549.226	301.87	393.702	8
Os01t0140500-01	1.19005	1.24027	0	0.58907	1.0925	0	5
Os01t0141100-01	10.1395	9.53235	15.4804	8.88713	5.44227	11.977	1
Os01t0141150-00	0.569842	1.19517	0	0.726359	0.244686	0.503574	5
Os01t0141900-01	5.58806	3.60732	2.92016	15.0844	9.75796	4.71874	7
MSTRG.335.2	1.3859	1.2099	0.608892	0.980408	0.994888	0.440503	8
MSTRG.335.3	0	0.748907	1.15608	0	1.63945	2.17224	3
MSTRG.337.1	1.8835	1.25606	1.36539	1.93991	0.822883	0.369753	2
Os01t0142500-01	103.811	102.804	114.83	79.9842	125.81	150.471	3
Os01t0142800-01	5.41118	7.78317	12.5929	9.0063	17.8489	6.47989	4
Os01t0142800-02	1.63406	1.96565	2.04985	0.95159	4.07606	2.27008	4
MSTRG.342.1	4.42489	0	0	1.04236	0	0	8
MSTRG.343.1	5.83093	0	0	5.04152	0	0	8
MSTRG.344.1	5.74311	1.28764	0	3.97993	0	0	8
MSTRG.345.1	3.97166	2.1105	0	3.67816	0.284233	0	8
MSTRG.346.1	8.12085	0.568985	0	5.9938	0	0	8
MSTRG.347.1	6.43205	0.686301	0	4.12203	0	0	8
MSTRG.348.1	4.204	0.992871	0	5.1911	0	0	2
MSTRG.349.1	15.3062	6.14559	2.09269	13.3924	3.30953	0	8
MSTRG.350.1	5.00845	0.257896	0	4.94901	0	0	8
MSTRG.352.1	3.64859	0	0	6.30927	0	0	2
MSTRG.353.1	6.23078	1.55126	0	3.52266	0	0	8
MSTRG.354.1	7.66362	0.481006	0	3.11816	0	0	8
MSTRG.355.1	4.90623	1.32632	0	4.30455	0	0	8
MSTRG.356.1	3.82504	1.44854	0	4.26009	0	0	2
MSTRG.360.1	2.74397	1.53108	0.331527	3.61118	1.90352	0.67334	2
Os01t0143900-01	2.57631	14.2379	36.835	1.90874	49.4868	158.668	6
MSTRG.365.2	6.6611	8.67774	4.28599	9.68152	10.0899	6.3198	9
Os01t0144100-01	28.2296	32.9729	61.5582	43.0986	61.1978	68.4021	3
Os01t0144200-01	28.3985	32.5272	17.6575	35.7585	31.7832	32.2764	7
Os01t0144300-01	1.1098	0.786312	0.42752	1.32031	0.880485	1.02781	2
MSTRG.369.1	0	0	1.05497	0	0	0	1
Os01t0144380-01	0.71341	0.981828	0.434491	1.78127	1.40836	0.524827	7
MSTRG.373.1	0	4.24629	3.58474	0	2.10396	6.7817	3
Os01t0144700-01	224.914	232.086	149.802	185.355	153.89	108.798	5
Os01t0144800-01	3.1661	6.17353	8.64718	2.93213	9.17663	12.2396	3
Os01t0144900-01	3.28674	4.87925	2.18823	5.6256	5.50105	3.87211	9
Os01t0145200-01	0.795318	2.97193	2.93226	3.85316	2.43375	4.38222	6
MSTRG.379.2	22.409	19.5184	14.9955	22.7392	16.6295	24.9583	2
MSTRG.380.1	2.68926	3.87733	3.89901	1.26701	3.9817	3.52592	3
MSTRG.381.1	2.46048	2.58028	4.73918	0	2.38696	1.05687	1
MSTRG.382.1	15.6958	14.5966	2.88375	8.4818	3.95942	0.882047	5
Os01t0146200-01	7.35402	3.01704	4.10093	2.94734	2.59875	0.868393	8
Os01t0146801-00	0.639923	0	0	1.08759	0	0	2
MSTRG.386.1	20.1481	11.0517	10.917	20.3998	7.788	14.0245	8
Os01t0147250-01	2.24709	2.51978	2.5246	2.5939	2.56104	1.87872	9
MSTRG.391.1	6.90509	8.09269	3.7872	4.8304	3.45767	6.34119	5
Os01t0147700-01	13.049	5.93695	7.83216	13.5177	9.07177	2.77582	2
MSTRG.393.2	1.46023	0.517688	1.26108	1.96702	1.18484	0.912326	2
Os01t0147900-01	1.48267	3.42031	2.5542	1.3574	1.75618	2.39964	1
MSTRG.397.1	3.20674	1.53911	2.30224	7.81127	7.12728	1.58868	9
MSTRG.398.5	1.00015	2.34499	1.06911	2.51562	3.0984	1.22628	9
MSTRG.400.2	4.6718	3.34183	2.10856	7.02319	6.67154	3.49579	9
Os01t0148500-01	0.607704	0.730147	1.35708	0.190874	1.19968	3.34038	6
MSTRG.404.6	13.3737	7.38641	4.12149	13.0459	7.09249	8.50183	8
Os01t0149600-01	3.6707	1.54454	0.828361	2.59347	1.87211	1.49819	8
Os01t0153300-00	1612.87	485.778	334.556	1207.68	412.919	446.343	8
MSTRG.405.1	17.0142	7.38313	4.41489	5.97672	6.04613	6.22161	8
MSTRG.405.4	0.60844	1.36416	1.23575	2.34096	1.89294	1.14955	9
Os01t0149500-01	3.60166	2.4142	1.05256	5.17993	2.12056	1.76123	2
Os01t0149800-01	20.5108	52.6108	393.511	13.1008	365.311	1987.03	6
Os01t0150000-01	3.17493	6.94441	4.9981	2.12219	10.0494	6.58083	4
Os01t0150100-01	1.88556	1.83831	0.453976	3.25185	2.59139	1.57648	7
MSTRG.413.1	0.518771	0.872615	2.97895	0.598051	2.38961	10.4557	6
MSTRG.413.4	1.55254	0.84663	0.538269	1.67637	1.01331	0.823197	2
Os01t0150500-00	1.90632	0.929274	0.896568	1.32408	0.462339	2.86591	6
Os01t0150900-01	0	0	0.606824	0	0	4.98789	6
Os01t0150950-00	1.72627	0.726374	0.77913	1.89888	0.35217	0.316487	2
Os01t0151100-01	94.2713	92.4021	99.0857	83.016	114.317	128.788	6
MSTRG.421.1	0	0.255215	0.630262	0	0.389411	2.12131	6
Os01t0151600-01	3.62317	1.82776	2.91453	4.18203	3.75739	1.16455	2
Os01t0151750-00	0	0	0.991885	0.976565	1.04576	0.813824	4
Os01t0151900-01	13.7182	9.33846	6.70489	12.3308	9.471	8.6654	8
Os01t0152000-01	1.55693	1.55852	1.59763	1.6385	1.61422	2.18471	6
Os01t0152100-00	1.68824	1.4385	0.434509	1.62387	1.93731	2.43742	6
MSTRG.430.6	0	0	0	2.05171	3.52474	0.391769	9
MSTRG.430.30	2.02174	1.80495	0.594317	7.04861	1.3969	0.727131	7
Os01t0152900-00	11.7095	3.28168	2.1234	47.4655	19.0638	8.29621	7
MSTRG.431.2	0	0	0	0	1.08356	0.42162	4
Os01t0152600-00	11.778	13.195	9.94244	13.6871	10.8928	8.27328	2
Os01t0152687-00	1.17267	1.63968	0	2.53402	0.379209	0.603352	2
Os01t0152800-01	0.92591	1.08325	0.356683	1.80968	0.367297	0.327294	2
Os01t0152950-00	74.6188	67.1533	63.6827	60.1462	68.7759	86.4721	6
Os01t0152951-00	4.30317	8.32884	4.4301	13.9607	4.56194	6.20991	7
Os01t0153150-01	1.63682	2.10753	1.23574	2.6467	1.65291	1.57546	7
Os01t0153250-00	1.3227	1.21115	0.876391	2.39682	1.0043	1.60081	7
Os01t0153600-00	0	0	0.975804	0	0.332166	9.70675	6
MSTRG.449.1	33.6516	24.5238	25.3144	34.3155	30.1764	30.7142	2
Os01t0154500-01	0.688641	0.734781	0	0.992352	0.67973	1.08151	7
Os01t0154600-01	5.8267	6.27866	4.13476	3.909	4.76008	4.47866	5
Os01t0156300-01	57.6405	83.185	65.276	25.4576	47.4569	44.6308	5
MSTRG.461.1	0	0	0	0	0	6.77758	6
MSTRG.462.1	0.912824	2.16131	1.13028	1.0869	1.0079	1.2077	5
MSTRG.464.1	4.28922	6.89702	0.806911	2.67291	4.99326	1.71955	5
Os01t0157200-01	42.4724	82.2572	12.6045	15.5032	20.9167	10.5079	5
MSTRG.466.1	2.9395	7.84113	1.40663	3.11604	5.07756	3.21168	5
Os01t0157400-00	1.92949	5.0586	0.907469	0.446727	0.93592	0.414394	5
Os01t0157500-00	14.0996	26.3276	5.06029	10.286	19.571	6.93232	5
Os01t0157600-01	25.9076	43.4018	8.48839	14.5438	18.1128	4.81185	5
Os01t0157700-00	0.446287	0.965173	1.28136	0.385867	0.389957	0	1
MSTRG.473.3	0.810515	1.26708	0.139071	3.37831	0.372038	1.3646	7
Os01t0158100-01	10.9578	17.6633	19.008	12.5839	8.98366	19.6291	3
Os01t0158566-00	2.49138	4.70283	1.8934	1.6937	2.41694	6.84889	6
Os01t0158600-01	7.68501	4.9245	6.6027	8.31417	7.75446	7.84828	9
Os01t0158900-01	46.4198	27.7423	27.1416	60.1549	34.0617	32.1166	2
MSTRG.483.1	20.4663	31.0619	11.7143	25.1374	24.8163	14.8068	5
Os01t0159200-01	2.9783	34.3659	9.2963	0.39403	36.7095	65.6732	6
Os01t0159800-01	0.635345	1.5818	1.86768	0.199556	1.04521	1.11068	1
MSTRG.495.1	0	5.45627	3.00813	0.740418	3.87806	0.61703	5
MSTRG.498.1	1.87442	2.19294	1.42452	2.19881	1.82435	1.1573	7
Os01t0162500-01	15.0722	13.3773	11.7677	12.1743	13.9077	17.4416	6
MSTRG.500.1	1.95024	1.42603	1.38951	3.61224	6.28064	1.12885	9
Os01t0162800-00	1.20796	1.39796	2.23783	2.65585	0.914154	1.34377	7
MSTRG.503.1	1.91737	1.03729	0.973554	2.4882	1.88593	1.12989	7
Os01t0163000-01	1.21069	1.10088	0.877656	1.23587	1.05788	1.45144	6
MSTRG.506.1	1.46212	0.776955	1.17342	2.27788	1.06382	0.942051	2
MSTRG.507.3	0.748541	0.742527	0.542634	2.42701	2.64357	1.96284	9
Os01t0164700-01	2.14092	0.912108	1.21091	2.64936	3.19158	2.42864	9
Os01t0165000-02	1.83217	1.92138	0.75621	1.80559	2.023	1.94872	9
Os01t0165600-00	2.04446	8.576	4.80768	0	2.47921	4.73355	5
MSTRG.515.1	2.22738	1.55722	1.78758	5.04741	2.86926	2.2324	7
MSTRG.519.2	6.94154	3.73392	1.38315	7.52616	3.56079	3.3845	2
Os01t0166400-01	1.18659	0.941646	0.802839	1.12854	0.598656	0.320073	8
Os01t0166500-02	125.43	180.272	248.114	58.2978	105.411	141.142	1
MSTRG.523.1	0.613891	0.464959	0.210666	1.01291	1.51855	0.579926	9
Os01t0166800-01	205.497	57.4411	24.8296	190.891	48.283	23.7892	8
MSTRG.525.1	8.96618	7.54752	11.7158	9.28772	10.1307	12.2338	6
Os01t0167100-02	2.07394	2.5217	1.04269	2.65981	1.07538	2.222	2
MSTRG.527.2	3.59755	5.2611	2.9922	2.91816	6.82146	3.5337	4
MSTRG.531.1	4.82316	7.6625	8.3984	6.75471	13.7154	8.24948	4
Os01t0167900-01	19.2388	16.8944	51.1029	20.098	44.1544	14.7231	1
MSTRG.532.1	1.76938	2.75928	2.23643	3.17734	1.78536	1.0707	7
Os01t0168300-01	25.5164	34.6113	21.2009	30.7725	27.7886	38.3444	6
MSTRG.545.1	1.31584	0.702835	0.968713	2.18787	3.39689	2.91958	4
Os01t0170051-00	0.130525	0.13927	0.76739	1.12854	0.131704	1.25497	6
MSTRG.548.1	12.4672	8.09864	6.71227	13.1698	11.7504	8.62291	2
MSTRG.549.1	1.23546	3.56254	4.84241	3.49243	7.31686	5.82086	4
Os01t0170300-01	104.063	143.22	102.464	84.0118	66.2407	132.626	5
Os01t0170500-01	239.706	162.06	83.2234	150.075	226.643	110.023	9
MSTRG.554.1	4.1793	0.592246	0.288539	4.09949	0	0.521859	8
MSTRG.557.1	0.970648	3.43861	4.5651	0.898918	2.82493	6.67086	3
MSTRG.558.1	5.81109	4.85838	4.37286	6.13509	1.95941	3.94664	8
Os01t0170900-01	17.4172	29.1477	36.8763	16.2304	22.0129	43.9611	3
MSTRG.561.1	0	0	2.72116	0	0.934046	11.2668	6
MSTRG.562.1	0	0	1.44697	0	0.508519	14.0961	6
MSTRG.564.1	2.06105	2.31213	1.63162	2.31816	4.4988	2.80344	4
Os01t0172000-01	2.8463	1.2148	1.63444	1.56349	1.72321	2.53305	8
Os01t0172100-01	2.88198	11.2833	30.6634	3.28472	21.3406	65.8571	6
MSTRG.567.2	2.62462	3.40057	1.99324	3.43266	2.45917	3.03416	7
Os01t0172400-01	5.87231	3.57007	4.1563	6.11911	5.96604	2.32143	2
Os01t0172800-01	22.3958	40.0885	84.9907	21.194	36.4766	103.706	3
Os01t0173000-01	1.91258	3.28206	2.61677	2.73786	2.41404	2.3816	5
Os01t0173600-00	0	0	10.8406	0.794076	0	0	1
Os01t0173900-01	21.5141	13.2233	14.3039	26.6657	15.1596	19.0767	2
Os01t0174000-00	42.7447	35.7624	24.767	33.4094	24.6528	23.1625	8
MSTRG.579.1	5.4331	3.1143	3.72422	5.24424	9.43755	5.11415	9
Os01t0174100-01	13.4963	9.90262	4.24087	10.3444	15.6493	10.8449	9
MSTRG.581.1	27.0197	18.5929	4.81381	25.4855	25.4578	11.573	2
Os01t0174400-01	0.580675	0.806906	0.491401	1.62878	1.33379	0.638751	7
MSTRG.586.1	10.1031	10.2085	6.48352	13.2462	11.4437	10.4244	7
MSTRG.586.8	0.433873	0.430387	0	1.22648	0.758219	0	7
MSTRG.587.1	3.95106	5.59881	1.26837	1.11918	1.27767	2.26283	5
MSTRG.591.1	3.14437	4.42286	6.84244	2.2235	2.47425	0.825027	1
MSTRG.592.2	2.02519	1.30444	1.73177	3.3132	2.05542	1.98924	7
Os01t0175500-01	6.68629	6.40937	6.62868	6.85165	5.74208	6.77766	8
Os01t0176000-01	1.05391	0.736815	0	1.73856	0.170403	0.603589	2
Os01t0176100-00	0.621423	0.22102	0.198245	0.37928	0.209013	1.1386	6
Os01t0176500-01	42.5645	12.4981	6.55252	45.0656	8.77571	5.19612	2
Os01t0176800-01	1.14522	0.436913	0.502121	0.673742	0.427307	0.454074	8
MSTRG.608.2	6.02057	1.90339	0	3.47045	0	0	8
MSTRG.609.1	6.8504	0.798216	0	7.11495	0	0	2
Os01t0177150-01	4.73358	1.9975	1.00433	7.2932	3.64669	1.72252	2
MSTRG.616.1	3.07163	0	0	0.870068	0	0	8
Os01t0178000-02	4.38308	4.99929	3.7609	4.69972	5.07229	5.34072	4
MSTRG.618.1	1.12904	0.444005	0.13407	1.17631	0.821479	0.969929	2
Os01t0178200-00	0.311332	0.332192	0	0.538366	2.15112	0.816381	4
Os01t0178300-01	2.31506	5.00672	9.97037	2.18142	43.7997	68.6916	6
MSTRG.621.1	16.0126	11.6964	13.3667	17.3251	12.2108	8.57306	2
MSTRG.621.2	3.26776	2.1033	1.14357	2.32083	2.24346	1.99376	8
Os01t0178500-02	102.404	93.0006	70.9308	79.4023	72.8993	87.8011	5
Os01t0178850-00	84.4642	83.6216	132.801	59.3971	62.2505	27.5624	1
Os01t0179000-01	3.07434	9.45504	28.7307	1.49007	8.56815	17.7039	1
Os01t0179200-01	174.827	217.768	202.974	141.27	197.159	207.303	3
Os01t0179300-01	205.764	147.271	203.448	184.637	219.885	163.568	9
MSTRG.631.1	21.4747	12.698	16.5536	39.867	28.9052	12.8238	7
Os01t0179600-01	19.3239	43.0632	68.0983	10.296	23.0277	56.3088	1
Os01t0179700-01	8.64693	14.385	12.7317	14.1019	17.1146	20.3341	6
Os01t0180000-01	81.8684	94.195	64.2859	78.0836	71.8847	68.0694	5
MSTRG.638.2	0.652625	0.940943	0.630802	0.94045	1.181	0.665516	9
MSTRG.640.1	0.867218	3.68665	0	1.56064	6.8803	0	9
MSTRG.641.1	2.73622	1.29244	0	0.844673	12.5324	0	9
MSTRG.642.1	0.717617	0.813512	0.472507	1.40257	0.569339	0.775368	7
Os01t0180700-01	55.5373	18.4158	9.96899	45.602	13.4694	14.9518	8
MSTRG.645.2	1.47973	8.68995	3.20131	8.29911	1.29196	0.127119	5
Os01t0181000-00	66.5346	40.6785	40.3768	61.0222	45.3804	44.7581	8
Os01t0181033-00	2.557	1.22888	0.835183	3.21253	3.44015	3.06547	9
Os01t0181166-00	3.34237	4.01581	5.45852	2.54998	0.48675	1.94765	1
MSTRG.649.1	4.55349	3.76378	1.45483	6.06235	4.55933	3.5599	7
MSTRG.650.1	4.81017	0.98043	0	3.46328	0	0.401578	8
MSTRG.651.1	4.58794	6.56089	3.36787	9.84971	2.42774	3.86272	7
Os01t0182100-01	3.52845	2.53881	1.77396	2.72446	3.29324	6.84086	6
Os01t0182300-01	17.2374	98.8041	93.9277	16.7213	74.6633	236.291	3
Os01t0182400-01	21.9319	9.43254	8.00505	21.9665	8.35682	6.70283	8
Os01t0182500-00	50.4618	55.6396	52.6236	36.2248	36.7186	34.1056	5
MSTRG.658.6	13.0316	11.4088	6.26984	13.0736	10.027	12.6413	2
Os01t0182700-01	47.7157	62.2032	31.7403	46.4926	38.3618	36.6883	5
MSTRG.660.2	4.80595	6.11155	4.76403	11.9978	10.3383	8.12482	9
Os01t0183300-01	3.67486	1.668	0.651303	4.82486	2.85424	5.35349	7
Os01t0183400-01	12.8285	2.82417	1.99268	11.9154	3.69356	4.62155	8
Os01t0183500-01	8.30067	4.4809	43.1821	6.22302	69.3835	1209.29	6
Os01t0183600-01	0	0.17307	1.01182	0	3.16886	7.77754	6
MSTRG.667.3	0.349562	0.733163	0.996223	3.14535	3.60238	2.16237	9
MSTRG.668.1	49.256	12.5876	7.05318	29.0999	8.7462	5.42311	8
MSTRG.669.3	6.21045	5.97305	3.46929	7.5221	9.68328	8.7537	9
Os01t0183850-00	9.50305	19.7652	24.0737	2.69183	1.22921	5.03876	1
Os01t0184500-01	54.2555	37.8126	34.5481	62.2541	59.1627	50.0384	9
Os01t0184700-01	5.68998	3.6809	7.62406	4.12395	2.63998	5.91878	1
Os01t0184800-01	115.206	81.1442	81.3859	102.515	105.613	63.823	8
Os01t0185200-03	139.192	97.9769	101.96	190.573	139.067	83.6378	7
Os01t0185200-02	0	0.999833	0	1.30721	0.994888	0.453135	7
Os01t0185250-01	1.8983	1.88305	2.72517	1.91486	3.8703	3.04197	4
Os01t0185300-01	4.6656	4.94719	6.53238	3.3256	13.0208	5.5428	4
MSTRG.682.2	5.3825	9.03131	11.45	3.87025	13.014	12.2939	3
MSTRG.684.1	6.75958	3.79965	6.90056	6.39474	3.34695	5.04253	8
MSTRG.685.1	6.18782	4.46695	2.68749	13.1132	10.5574	4.84077	7
Os01t0187000-01	4.38804	6.41713	4.12752	3.94835	4.59347	6.58497	3
MSTRG.694.1	0	0.112951	0.302886	0	0.154655	3.19889	6
MSTRG.695.1	2.63186	5.152	3.04156	3.57839	4.1761	1.62495	5
Os01t0187900-01	9.53789	17.7198	13.2346	13.373	16.2662	36.9401	6
MSTRG.697.1	3.36134	9.61774	6.0684	1.79621	10.6904	9.5261	4
Os01t0188200-01	1.27982	1.04801	0.564674	3.07256	1.61164	0.503703	7
MSTRG.700.1	0	2.23767	0	0	0	2.71315	3
MSTRG.703.1	0.883724	4.33207	3.24586	0.832709	2.47098	4.13188	3
MSTRG.709.2	2.87433	2.57778	1.18365	3.41467	3.04718	3.69545	9
Os01t0191100-01	1678.61	1104.24	873.7	2062.8	1209.01	705.089	2
Os01t0191300-03	1.00325	1.64736	1.13132	1.47978	2.80575	2.27586	4
MSTRG.713.1	1.27433	6.64052	0	3.67722	1.35096	0	5
Os01t0191400-01	1.67396	1.34709	1.2925	1.80574	1.62747	1.48251	7
Os01t0191500-01	459.855	397.664	484.227	571.763	569.112	325.985	9
Os01t0191700-01	127.31	110.639	143.523	111.72	98.5145	117.152	1
Os01t0191900-01	9.32678	11.6148	13.4337	8.36761	9.61359	35.0292	6
Os01t0192300-01	1.05819	3.83891	5.3186	0.968784	8.77378	9.30653	4
Os01t0192300-02	0	0	0.481381	0	1.28778	0.771531	4
Os01t0192500-00	3.28064	8.79569	9.25759	3.48477	5.17175	9.8111	3
Os01t0192550-01	4.48801	2.67394	1.42116	3.81381	0.741807	1.92428	8
Os01t0192600-01	1.0031	1.57432	1.83359	0.993061	1.06342	1.84237	3
Os01t0193250-00	17.739	4.03986	4.27094	22.6114	2.51316	5.98679	2
Os01t0193600-01	6.18044	3.75739	2.20099	5.44939	4.00587	6.50344	8
MSTRG.736.1	9.56991	7.25674	3.07213	7.6805	3.16355	3.69288	8
MSTRG.738.1	11.0484	7.49618	6.90991	3.37151	5.77346	4.09049	5
MSTRG.740.1	0	0	2.49839	0	1.1405	0	1
Os01t0194600-02	2.32109	13.386	25.5757	4.81162	10.9519	28.4033	3
Os01t0195066-00	1.45095	2.09196	1.38864	1.36719	1.43218	1.26824	5
Os01t0195100-01	1.46229	2.60044	4.24017	2.75574	1.4755	3.82752	1
Os01t0195300-00	9.0136	21.2838	22.0758	10.5962	8.2478	12.1728	1
Os01t0195400-00	35.7601	51.2086	58.6653	31.6456	59.6773	93.8351	3
Os01t0195500-01	253.556	212.049	244.79	233.398	253.804	254.441	4
Os01t0196300-01	0.178362	0.353857	1.55158	0.168065	0	0.840347	1
MSTRG.751.1	4.33609	1.69097	3.26292	9.21179	5.04783	8.03151	7
Os01t0196500-01	58.437	63.1586	49.5277	42.7359	39.8835	74.2032	6
Os01t0196600-01	173.014	178.859	203.524	136.219	134.357	122.665	1
Os01t0197100-02	0.441187	0.989171	0.2271	1.06091	0.228765	0	7
Os01t0196800-01	0.853793	0.846933	0.209153	1.20676	0.842744	0.167609	7
MSTRG.757.1	0.641216	0.375089	0.741035	0.923143	0.381544	1.65255	6
Os01t0197200-01	2.01143	3.28129	1.75219	3.06353	1.60457	3.12599	5
MSTRG.759.1	2.03202	1.72767	1.54429	3.57553	2.5627	1.97529	7
Os01t0197400-01	1.78687	1.00157	0.907292	2.16426	0.308844	1.40667	2
Os01t0197450-00	4.40061	2.70238	2.39559	2.53656	1.31567	3.51713	8
Os01t0197500-00	1.73308	2.18639	1.27365	2.9969	2.65008	0.779141	7
Os01t0197700-01	5.52132	3.41073	1.28137	3.42275	1.02628	1.14301	8
MSTRG.763.1	9.99937	4.04052	1.27898	12.6607	3.78929	2.04988	2
MSTRG.764.1	9.48379	3.47443	1.63675	14.3567	3.13754	1.49483	2
Os01t0198702-01	7.05552	5.49908	6.81959	8.07424	3.30266	8.1493	2
Os01t0199400-02	1.8437	3.10126	1.41162	3.03827	3.34865	2.25615	9
MSTRG.771.1	1.45709	2.29205	0.922796	2.24901	1.44502	2.06165	7
MSTRG.772.1	2.1241	2.9584	1.75341	2.32074	1.56356	2.6068	5
MSTRG.773.1	4.72658	7.66655	3.4736	3.89701	2.98081	1.85577	5
Os01t0200400-01	167.412	190.122	210.731	139.718	197.004	193.49	1
Os01t0200500-01	103.055	70.7067	76.1563	91.3991	70.5368	80.1127	8
Os01t0200600-01	9.05225	10.361	11.1052	7.64993	7.37751	21.3247	6
Os01t0200700-01	13.8033	37.8126	51.2567	14.659	205.021	228.486	4
MSTRG.784.3	0.557498	0.543527	0.357936	2.23729	1.26196	0.638574	7
Os01t0200950-00	1.78771	0.953742	0.57031	1.68451	2.08275	1.30216	9
Os01t0201100-01	0.362124	5.6488	5.84815	0	7.00295	57.0132	6
MSTRG.788.1	5.2297	3.23045	1.51737	4.43772	6.41956	3.52882	9
MSTRG.788.3	1.85895	1.50761	1.33433	2.29902	4.12851	1.00356	9
Os01t0201250-00	19.5067	18.7031	8.20652	13.0243	6.90899	7.90005	5
MSTRG.791.1	0.870571	0.418391	1.12195	1.25452	0.760688	4.95751	6
Os01t0201600-01	2.63475	4.36855	4.07464	1.20607	1.38132	2.53326	1
MSTRG.793.1	7.57975	0	0	2.41541	0	0	8
Os01t0201700-01	0.2102	0.595723	0.199684	0.389333	1.0423	0.361154	4
Os01t0201700-02	0.80152	0.260478	1.26904	0.454076	0.51838	1.44337	6
MSTRG.796.10	1.18363	1.3386	0.623479	0.96462	3.21513	2.11499	4
Os01t0202800-00	0.386604	1.91741	1.46905	0.347865	1.87526	5.31394	6
Os01t0202500-01	5.06961	5.30979	4.35396	2.04129	1.51433	3.40839	5
Os01t0202700-00	0.559169	1.25369	1.13568	0.537848	2.31953	5.28231	6
MSTRG.801.1	19.1357	31.3393	23.2587	23.8672	18.503	23.9456	5
Os01t0203400-01	0.772165	5.76731	19.294	0.727589	5.33521	4.85999	1
Os01t0203800-01	5.64879	4.21909	4.59527	9.89018	4.68902	1.97498	7
MSTRG.806.1	4.47634	3.4495	3.17626	7.70863	3.64159	3.64281	7
MSTRG.807.1	4.61471	3.93912	0.90437	12.1753	7.28799	10.7881	7
Os01t0204000-01	4.59586	2.71104	0.945656	12.0184	4.93357	1.48057	7
MSTRG.810.1	0	6.01942	3.83585	0	3.62644	5.4056	3
MSTRG.811.1	0.946606	2.47608	3.84515	1.14653	4.34506	4.16512	3
MSTRG.812.1	0.191129	1.07131	0.970465	0.189215	2.281	1.10378	4
MSTRG.813.1	3.89603	1.97731	3.15273	4.89406	5.46268	2.05909	9
Os01t0205300-00	3.48831	5.93192	9.63334	4.22606	15.2483	16.9875	4
Os01t0205500-01	5.36004	5.31698	3.4199	5.72404	5.04791	5.93443	7
Os01t0205550-00	1.08506	0.538171	1.04878	0.993383	1.6423	0.48781	9
Os01t0205600-01	10.1337	15.1725	13.4087	8.37931	6.21619	11.8147	1
MSTRG.818.1	12.8451	5.32052	7.28592	16.4737	8.19748	2.11725	2
Os01t0206300-00	1.62476	0.433406	1.76674	0.382742	0.409861	3.34908	6
Os01t0206600-01	189.378	252.191	181.245	195.702	195.249	247.162	3
Os01t0206650-00	1.74357	2.01543	0.983076	2.38691	1.14263	0.508004	2
MSTRG.828.1	1.13764	1.6637	0.547808	4.35034	2.2073	0.502672	7
MSTRG.829.1	7.49768	6.83004	6.53303	5.78263	6.58092	17.9842	6
MSTRG.831.1	3.36231	2.64451	3.56191	2.00005	2.1202	3.89943	3
Os01t0207200-01	36.4461	43.9317	44.7902	34.2936	37.7954	34.2708	1
Os01t0207400-01	135.058	311.974	363.693	76.186	245.6	307.173	1
MSTRG.834.1	238.051	270.175	532.169	107.844	261.075	194.886	1
Os01t0208400-01	4.63135	34.8074	53.3745	1.14376	60.4745	56.3553	3
Os01t0208700-01	1.60709	1.99526	2.56346	1.22609	1.49817	5.77495	6
MSTRG.839.3	1.7907	1.90312	2.02008	3.0058	1.53783	3.06601	6
MSTRG.841.2	2.17891	1.45988	1.17974	3.6274	3.38513	2.37503	9
Os01t0210200-00	0	4.20704	2.05118	0	3.245	4.63727	3
Os01t0210500-01	36.3412	62.8356	81.5387	33.6556	40.008	98.5283	3
Os01t0210550-00	0	0	1.31383	0	0.593856	0	1
Os01t0210600-02	320.104	458.23	490.108	253.093	513.544	799.387	3
Os01t0211600-01	56.7916	36.8103	27.3749	29.4141	28.7716	28.8112	8
MSTRG.861.1	29.1067	14.8643	6.67417	38.6617	16.4947	3.57211	2
MSTRG.862.1	34.5039	27.609	25.6026	31.2171	26.8117	5.30891	8
Os01t0212000-01	53.2363	59.2246	31.689	60.2248	47.1909	39.5743	2
Os01t0212400-01	466.684	429.738	462.749	406.079	387.258	244.113	5
Os01t0212700-01	25.0998	33.1975	62.0564	8.78402	29.5477	79.3073	3
MSTRG.869.1	4.80912	7.79415	6.16854	4.04884	3.00364	10.5162	3
Os01t0212900-00	1.00763	2.81783	12.7629	0.622108	5.66259	4.61666	1
Os01t0213800-01	1.4406	1.41615	1.02662	1.6985	2.58537	0.801301	9
Os01t0214500-01	1.17556	1.24936	3.96248	0.998967	1.16583	11.9468	6
Os01t0214800-02	0.101199	0.153296	0.305273	0	0.419792	1.30109	6
MSTRG.880.1	24.0788	34.4307	30.1523	16.545	12.2191	31.0281	1
Os01t0215100-00	2.51576	6.6548	4.86328	2.90023	5.86193	14.6597	6
Os01t0215700-01	3.50511	1.19691	0.903835	3.65043	1.48917	0.644994	2
MSTRG.884.2	24.4853	26.5579	15.7941	26.7918	22.434	16.2141	2
Os01t0216300-01	0	0	0.17741	0	0	4.90587	6
Os01t0216400-00	0	0	0.779523	0	0.948929	2.34514	6
Os01t0216500-00	0.261142	0.988942	1.5755	0	0.830537	1.19908	1
MSTRG.892.2	0.301747	0	0.621295	0	0.831036	1.24472	6
Os01t0217100-01	1.53069	0.653299	0.899932	0.560545	1.23562	3.57839	6
MSTRG.896.2	0.662043	0.42384	1.02385	0.998119	1.33605	0.833377	9
MSTRG.896.3	0	0	0	0	1.11385	0.192973	4
Os01t0218032-01	228.372	173.251	173.409	234.619	234.552	221.982	9
Os01t0218500-02	37.3236	37.2739	25.8379	27.3272	42.8148	69.8393	6
Os01t0218800-01	7.99177	4.73831	4.59056	12.4465	10.4271	5.62043	7
Os01t0219000-00	36.4916	35.8781	30.2884	36.8193	26.5243	35.4243	8
MSTRG.905.1	0.674351	0.58336	0.396468	1.16611	0.532499	1.29675	6
Os01t0219100-01	3.51004	7.3989	3.00948	2.89398	6.06308	6.51957	4
Os01t0219300-01	5.63465	18.6481	13.4816	9.74362	17.0083	15.6872	3
MSTRG.910.1	0.520331	1.09133	1.95775	0	1.78741	0.803151	1
MSTRG.911.1	14.7296	12.8189	17.929	10.5635	7.60223	15.35	1
ENSRNA049471356-T1	13.4285	6.69057	4.54558	12.1984	10.958	8.45701	8
ENSRNA049471305-T1	1.63327	1.7427	1.6004	4.61695	2.85424	3.84756	7
MSTRG.914.1	0	0	0	0	1.56994	0.699478	4
Os01t0220300-01	5.19676	5.38139	4.5122	2.87756	3.49025	4.31921	5
MSTRG.919.1	2.35882	2.92484	7.05476	2.50049	0.772911	8.74877	3
Os01t0220500-00	0	0.265508	0	1.38818	0	0	7
Os01t0221000-00	0	0	0	0	1.13104	1.13142	4
Os01t0221100-01	0.93425	1.89803	1.14929	2.05614	1.08983	2.07863	6
Os01t0221300-01	58.4509	52.1821	39.7081	81.9839	45.9899	36.0545	2
Os01t0221400-00	39.5892	80.5839	72.8682	29.2198	140.337	89.819	4
Os01t0221500-01	2.47467	2.93831	3.37684	5.06426	4.99407	3.79572	9
MSTRG.926.1	9.91881	8.26784	5.90002	10.1641	8.67942	10.5259	2
Os01t0221600-01	0.40305	0.39295	0.191443	0.685006	0.5192	1.03875	6
Os01t0221900-01	4.20289	2.29464	3.83293	3.57152	5.0017	8.6654	6
ENSRNA049471366-T1	8.35268	1.18361	0	18.4546	1.62062	0	2
Os01t0222300-01	28.398	6.19092	5.13691	19.066	4.54938	4.87918	8
MSTRG.932.1	27.6066	4.97534	3.96315	35.1175	5.44987	4.33559	2
MSTRG.933.1	19.4435	4.40869	1.49763	25.0073	5.21148	4.06298	2
Os01t0222700-02	3.33019	1.56553	1.18818	3.20316	1.87374	0.71036	2
MSTRG.937.1	6.61073	5.06801	3.56886	7.61635	5.72626	4.45626	2
MSTRG.937.3	5.03343	4.97946	2.28117	5.79454	3.52358	2.17083	2
MSTRG.943.2	1.07663	1.43596	1.0304	1.2681	1.90113	1.69408	4
MSTRG.943.4	6.67076	10.0191	5.90345	7.81356	11.0189	7.02672	9
MSTRG.944.4	6.65955	6.3763	4.72849	11.4705	9.7421	8.69501	9
MSTRG.945.1	2.60042	2.0553	1.56699	4.05603	1.68311	1.66383	2
MSTRG.945.2	0.863847	1.44377	0.356544	0.914296	0.953818	0.380966	5
Os01t0223900-01	12.9487	18.7618	17.8885	11.7043	22.5606	17.0925	4
Os01t0224000-00	49.0936	17.4849	10.2398	48.1401	15.0266	12.1789	8
Os01t0224200-00	45.4612	17.5692	5.88913	70.9423	9.62243	8.76534	2
Os01t0224300-01	65.3662	54.5559	53.9301	68.5104	48.056	45.3139	2
MSTRG.953.1	3.08871	3.87169	3.45873	1.72047	1.71224	2.59954	5
MSTRG.953.2	1.23077	1.5999	1.28633	0.697254	0.66333	0.725095	5
Os01t0225100-01	1.38909	0.778611	0.793483	2.40658	1.62062	0.71626	7
Os01t0225300-01	0.898265	0.50917	0.245625	0.82237	1.23339	0.672986	9
MSTRG.957.1	7.87138	29.7937	16.4947	5.78887	21.561	13.7231	5
Os01t0225500-00	0.78291	1.42791	4.37279	0.177799	0.811912	4.31385	3
MSTRG.959.1	6.32951	0	0	4.96691	0	0	8
MSTRG.960.1	7.18399	1.71222	0	4.40737	0.280432	0	8
MSTRG.963.1	22.5201	15.739	22.0428	31.1067	40.2828	14.2661	9
Os01t0226250-00	1.63142	3.7069	0.839772	2.96397	5.18857	2.31174	9
Os01t0226500-02	1.18951	0.702328	0.572786	1.85317	2.63897	1.53005	9
MSTRG.972.1	2.14678	3.87203	2.32222	2.60776	6.59992	4.88724	4
Os01t0227300-01	300.921	261.829	288.748	290.172	390.616	245.335	9
Os01t0227350-00	1.76055	1.47123	2.66438	2.26305	1.70794	3.10569	6
Os01t0227500-01	24.4541	28.2081	23.9558	16.429	29.0304	11.6772	5
Os01t0227800-01	10.643	22.5007	25.1893	8.31482	16.0688	20.4793	1
MSTRG.979.1	2.99918	1.13578	3.08765	3.40557	4.13	4.81995	6
MSTRG.980.1	0.789758	4.21337	5.67502	0	2.07877	5.16795	3
Os01t0228300-01	183.843	174.553	138.743	169.961	163.658	172.793	8
Os01t0228600-02	8.28853	6.64689	5.27405	6.32142	8.51385	10.6807	6
MSTRG.985.2	2.07129	1.44135	1.20664	2.9681	2.36262	1.88918	7
Os01t0228901-01	22.1064	8.05701	5.40137	27.3861	10.464	4.02255	2
Os01t0229100-02	94.0701	80.1977	69.1125	102.655	71.8912	57.2668	2
Os01t0229200-01	6.97422	6.15213	8.39225	8.14945	12.8052	2.45244	9
Os01t0229300-01	19.7329	19.9782	17.3454	24.4044	25.1819	25.1111	9
Os01t0229700-00	1.04182	1.42033	1.28706	1.44395	1.1477	2.95253	6
MSTRG.996.2	3.51828	5.63102	3.40064	5.57694	5.32512	7.90858	6
MSTRG.997.7	0.465572	0.909785	0.718958	1.09466	0.427409	0.106888	7
Os01t0229900-03	1.42909	1.53261	1.22184	2.30739	0.992082	1.2629	2
MSTRG.998.1	1.08364	0	0	1.96877	1.12379	2.98545	6
Os01t0230200-01	7.06549	7.77224	3.89055	5.9955	6.10602	6.66183	5
MSTRG.999.2	1.03502	1.64272	0.304257	2.04807	2.61093	0.452341	9
MSTRG.1000.1	3.51692	6.00038	2.50574	3.73575	2.55887	3.88491	5
Os01t0231000-01	1.9331	1.67788	2.3126	1.13844	1.47797	2.27694	3
MSTRG.1002.1	4.66853	6.3252	5.63316	8.78141	2.90488	8.08834	7
MSTRG.1003.1	5.15263	6.02821	5.87383	3.81748	5.10996	7.28548	3
Os01t0231500-02	0.226446	0.633258	0.436162	0.271674	1.53776	1.10684	4
MSTRG.1006.1	8.6337	3.98716	5.39591	11.5843	6.83282	5.07477	2
MSTRG.1007.4	6.21497	5.15287	3.90845	8.828	5.85987	5.9999	7
MSTRG.1010.1	2.92743	7.91385	15.5976	1.72402	13.003	10.6317	1
Os01t0232200-00	66.578	99.2274	82.1642	50.6675	47.8073	22.2906	5
Os01t0232300-01	2.16116	4.14377	1.21971	5.53734	6.63917	0.611569	9
Os01t0232400-01	1.55589	1.1296	1.0132	3.66151	3.70018	0.831316	9
MSTRG.1016.2	1.571	2.77636	1.61734	4.92502	4.56704	2.22612	9
MSTRG.1018.1	5.68051	9.32757	8.99843	5.50127	6.61802	9.0451	3
MSTRG.1020.2	0.474095	1.01172	0.116139	0.976587	0.207128	0.106569	5
MSTRG.1024.1	1.36423	0.983464	1.30564	0.786359	1.98673	6.54206	6
Os01t0234001-01	1.45906	1.65763	1.48169	1.98812	5.29588	4.21309	4
Os01t0234200-00	0	0	0.471654	0.21305	0.430616	3.87684	6
Os01t0234700-01	36.7005	60.8513	48.1846	16.1382	14.9652	32.6136	5
MSTRG.1030.1	1.85129	2.6715	1.14554	4.10932	1.96262	2.23226	7
Os01t0234900-01	3.51968	3.36019	2.32768	2.54392	1.45678	1.74557	5
Os01t0235100-01	18.9063	13.1594	16.0687	34.7084	32.1753	32.2403	9
Os01t0235200-02	0.570183	0.538648	0.36608	0.528047	0.553146	1.02678	6
MSTRG.1035.1	1.81964	1.09213	0.544217	1.77002	2.1862	1.87539	9
Os01t0235400-02	194.706	141.23	107.4	206.477	143.118	112.955	2
Os01t0235400-01	192.811	59.2786	107.406	178.994	93.218	44.7716	8
MSTRG.1038.1	1.76896	0.985504	0	7.08662	0.490315	0.390065	7
MSTRG.1042.1	0.137082	0.830601	0.55683	0.622625	0.581299	4.78371	6
Os01t0236000-01	4.88353	5.59857	5.40153	1.64406	1.79329	2.61883	5
MSTRG.1044.1	2.74501	4.50464	3.25218	3.52046	1.68	0.864378	5
MSTRG.1046.1	0.712225	3.59406	1.39579	0	4.21805	8.38908	6
MSTRG.1047.1	2.44961	7.25584	4.92626	3.63064	6.62808	7.65836	3
MSTRG.1048.4	0.722117	1.04114	1.38221	0.624355	1.45728	2.52473	6
Os01t0237200-00	6.97587	4.5722	5.8784	9.6329	5.07557	3.8529	2
MSTRG.1053.1	0	0	0	4.77961	1.10805	4.43368	7
MSTRG.1054.1	0	2.14859	8.55737	0	5.63862	29.7017	6
MSTRG.1055.1	7.81365	3.45219	6.61236	8.76834	4.14176	3.69067	2
MSTRG.1056.1	4.14443	5.05327	2.62275	6.1832	2.81242	2.87245	2
MSTRG.1057.1	2.39549	2.11651	1.61953	4.2621	2.05721	1.45538	7
MSTRG.1058.1	7.55599	4.6689	4.13228	5.59975	3.77273	3.88223	8
MSTRG.1059.1	4.29859	2.65613	2.86883	3.8417	1.71739	2.33067	8
Os01t0238200-02	0.95545	1.01947	0.914417	1.6522	0.471543	0.835134	2
Os01t0238200-01	81.6462	109.079	93.9484	52.2304	63.8196	115.091	3
Os01t0238500-01	0.205504	0.203853	0.604105	0.355364	1.62275	0.898127	4
Os01t0238600-01	364.714	301.821	348.946	324.307	272.26	381.23	6
Os01t0238850-00	0.900302	1.94706	0.435099	0.412118	0.454219	1.57386	5
Os01t0239000-01	0.666235	0.168201	0	1.70889	0.235433	0.209791	2
MSTRG.1069.1	4.18731	2.42297	2.67165	5.43063	1.40838	0	2
MSTRG.1072.1	22.2864	11.0392	16.5677	37.95	20.4	5.55842	7
MSTRG.1075.1	0	11.1169	8.07375	0	7.01802	13.4791	3
MSTRG.1076.2	0.947468	0.615817	0.150012	1.56297	0.459579	0	2
MSTRG.1076.3	2.97719	1.64064	0.628501	3.12535	1.44412	0.730825	2
MSTRG.1077.1	0	0	0	1.4619	1.66893	0	9
Os01t0241000-01	18.0786	21.2513	28.6886	17.2831	18.5248	23.6492	1
Os01t0241100-01	64.0591	34.1537	25.96	84.4113	43.6354	31.0459	2
MSTRG.1081.1	5.44371	6.54053	5.11552	6.78346	7.61212	7.40164	4
Os01t0242900-02	3.50968	4.8734	3.4453	3.26333	7.08837	5.96789	4
Os01t0243000-01	13.439	21.0092	20.9032	18.582	21.5934	19.9226	4
Os01t0243200-01	6.20273	7.63808	4.44481	12.6301	10.0282	5.09634	7
Os01t0243300-01	0.360641	1.07323	1.41354	2.31119	3.20377	0.972801	9
Os01t0243600-00	18.532	21.186	34.2053	18.582	16.5784	53.223	6
MSTRG.1098.1	12.313	1.69633	0.98818	9.88203	0.995424	1.31983	8
Os01t0243901-00	10.418	1.96836	1.3066	8.36171	1.01067	0.306883	8
MSTRG.1100.1	2.62626	0.393447	0	3.20706	0.161099	0	2
Os01t0244150-00	4.72324	5.61364	1.49565	1.60548	2.74927	0.729051	5
MSTRG.1103.1	0	1.66567	3.82415	0	1.28406	7.25206	3
Os01t0245700-00	0.472658	0.756491	0	1.02167	1.6329	0.206569	9
MSTRG.1105.5	2.95619	7.60642	1.60987	2.79998	1.35846	0.960632	5
MSTRG.1111.2	2.61185	2.55552	2.00858	4.70027	2.77707	3.63277	7
Os01t0246601-00	2.77207	35.8535	40.9349	0	37.693	27.7633	1
MSTRG.1113.1	0.244383	1.2121	4.91163	0	0.213537	1.24735	1
Os01t0247500-01	1.96817	2.53806	2.6633	3.52364	4.66248	12.364	6
Os01t0247900-01	36.639	64.1451	30.692	17.4263	61.2847	16.4701	5
MSTRG.1118.1	0.954722	1.08466	0	1.30091	1.48513	1.35285	9
Os01t0248450-00	0.565559	1.47356	0.57433	1.02751	0	0.699889	5
Os01t0248600-01	0.72953	1.36305	0.246948	2.16668	1.33946	0.689167	7
MSTRG.1120.6	2.31527	1.0439	0.608111	1.7886	2.16907	1.67402	9
Os01t0248701-00	0.708073	11.642	40.5829	1.71524	0.489535	2.53139	1
Os01t0248800-01	1.87548	3.10068	2.41702	1.17814	3.15404	6.55723	6
Os01t0248850-00	5.1011	8.3214	5.86452	5.77974	10.2217	10.7121	4
Os01t0249200-01	540.141	1796.49	3345.34	196.515	2288.19	3858.86	3
Os01t0249300-01	3.70141	4.8466	2.40886	4.74332	4.78664	4.65884	9
Os01t0249900-01	59.8623	63.9872	64.4528	63.2142	50.5096	63.3752	1
MSTRG.1129.1	26.1571	30.9081	30.8703	41.2924	33.099	36.0631	7
MSTRG.1130.1	1.9707	0.34231	1.33417	2.60129	2.43741	0.904883	9
MSTRG.1131.1	1.58108	1.9604	1.12649	2.01535	0.391997	0.610115	2
MSTRG.1132.8	0.869594	1.32645	0.817965	0.873319	1.15038	1.83366	6
Os01t0250600-01	1.33297	1.12073	0.343072	0.961608	0.706562	0	8
MSTRG.1134.3	5.711	5.86558	2.3491	9.37836	5.35957	3.79815	7
MSTRG.1135.1	16.8373	21.0671	21.0998	14.8279	13.1452	19.6963	1
Os01t0252100-01	1.87924	0.847339	1.32102	4.34641	8.09422	1.60982	9
Os01t0252100-02	1.66503	2.94937	2.52898	2.67356	3.63717	1.49423	9
Os01t0252200-01	41.6422	38.0749	39.9172	34.4615	42.533	43.2033	4
Os01t0252300-01	2.29942	54.1493	65.2865	1.32541	36.3146	78.845	3
Os01t0252400-01	1.74601	5.45431	3.89907	1.59849	4.59579	4.57017	3
MSTRG.1145.1	4.0639	5.55895	6.44832	1.25725	3.73078	8.17235	3
MSTRG.1146.1	34.9718	31.3571	21.8855	38.8764	23.8712	28.6414	2
Os01t0252900-01	3.11688	3.03877	3.00174	5.73875	4.01509	2.98394	7
Os01t0253400-01	12.0431	22.733	12.1137	8.67463	19.9913	15.8637	4
Os01t0253900-01	0.876836	1.02807	0.667826	2.00308	2.27329	0.905885	9
Os01t0254000-01	447.361	501.7	480.312	610.218	599.26	510.959	9
Os01t0254200-01	238.472	281.942	362.722	244.947	400.521	283.174	4
Os01t0254300-00	11.3681	13.0217	6.14035	7.65267	9.49501	5.40667	5
MSTRG.1159.2	6.53359	6.75206	5.16237	12.4646	9.76108	5.77379	7
Os01t0254800-01	4.28558	5.84533	3.58884	11.7705	9.90987	5.45889	9
Os01t0254900-01	288.152	297.39	296.408	212.259	265.597	204.159	5
Os01t0254950-01	12.1219	10.8487	12.6024	15.9529	22.1449	9.04337	9
Os01t0255000-01	187.878	228.943	309.295	141.165	208.767	633.658	6
Os01t0255100-01	2.78016	3.61399	1.78498	2.71005	1.98963	3.78157	5
MSTRG.1166.1	0.530686	0.594917	0.27317	0	0.243592	1.53237	6
MSTRG.1167.1	8.67859	18.8594	21.352	4.57006	5.93623	24.0696	3
Os01t0256400-01	264.229	248.656	212.996	236.74	179.012	191.515	8
Os01t0256500-02	438.186	264.217	391.419	101.112	120.206	232.702	1
Os01t0256600-01	256.573	238.202	204.559	230.441	196.879	194.009	8
MSTRG.1173.2	0.145978	0.86883	0.84658	1.13593	1.40308	0.765572	9
Os01t0257100-01	12.0314	12.5391	13.394	4.68401	21.3015	15.2436	4
MSTRG.1177.1	4.14153	3.25738	1.7486	6.62495	3.65087	1.50936	7
Os01t0257900-01	2.07762	1.88286	1.28425	3.56237	1.21781	1.19467	2
Os01t0259200-01	0.790044	1.20425	0.545448	1.48887	3.11928	1.97302	4
Os01t0259300-01	0	3.33163	6.14215	0	6.56211	11.3408	3
MSTRG.1186.1	3.08157	1.0772	0.659497	2.53675	1.32866	1.32126	8
Os01t0259966-00	0	1.30242	1.15273	0.551346	2.43068	0.945796	4
MSTRG.1188.3	0	0	0	0	2.87464	0	4
MSTRG.1189.1	0.615305	0.310687	0.351919	1.05217	0.313815	0.193754	2
MSTRG.1190.1	6.86423	5.75875	6.19842	3.0332	4.26184	3.39046	5
MSTRG.1191.2	3.87251	3.89075	2.66214	3.32518	3.91784	5.15142	6
Os01t0261200-01	56.7698	53.0217	84.2936	61.2633	67.1811	28.1414	1
MSTRG.1197.1	3.80665	8.3313	16.6224	4.52225	3.632	5.59326	1
MSTRG.1199.1	2.07724	6.47576	4.68938	2.11823	4.28136	6.06729	3
MSTRG.1200.1	6.59879	6.43344	5.89666	6.11115	8.50739	2.55098	9
Os01t0262600-01	4.42698	5.41608	2.54211	11.2131	5.41549	4.64389	7
MSTRG.1202.1	14.2232	7.95585	7.9303	14.9053	13.7982	12.8619	9
MSTRG.1203.2	2.7373	3.27523	2.12757	6.2223	1.72749	1.31944	7
Os01t0262700-01	0	0.373279	0.18186	1.37803	0.569554	0	7
MSTRG.1204.1	4.98701	5.59726	1.1687	10.1058	1.19348	3.26152	2
Os01t0263300-01	100.193	206.582	385.969	73.0277	461.279	384.151	4
Os01t0263400-00	11.3421	6.14547	5.43535	14.9158	7.50148	7.66445	2
MSTRG.1209.2	0.785384	0.679412	0.153916	1.62974	1.24035	0.61672	7
MSTRG.1213.1	1.47496	3.72151	2.13846	0	1.45588	3.47462	3
MSTRG.1215.1	0.91266	1.02312	0.926814	2.63358	1.11713	1.25492	7
Os01t0264600-00	0.790259	0.996958	3.02528	0.744639	1.1961	6.20547	6
Os01t0265000-01	25.4863	17.0852	10.9882	19.0516	8.17817	11.3478	8
MSTRG.1220.1	0.887916	2.21062	1.98283	1.08386	7.88784	7.66956	4
Os01t0265400-01	3.65944	4.6743	3.48756	8.97192	2.89093	2.00755	7
MSTRG.1224.3	0.611564	1.34154	0.871455	1.03939	0.6065	0.70798	5
Os01t0265800-01	0.49412	1.18736	0.955196	1.56649	1.3006	0.592378	7
MSTRG.1225.1	6.2132	5.64968	3.96425	9.75755	7.31424	4.42268	7
Os01t0266100-01	16.4528	29.4076	33.2132	2.53949	22.7752	21.7901	1
MSTRG.1230.1	17.6135	20.12	15.3664	17.1423	18.1333	13.5935	5
Os01t0266400-01	66.2205	91.5953	117.653	61.3269	97.5601	94.1599	1
Os01t0266500-01	39.9649	37.6464	42.9261	32.8134	33.9488	42.8181	1
Os01t0266600-02	1.1431	1.88979	3.22571	0.323795	1.10895	1.34689	1
MSTRG.1234.1	0.975331	0.633183	0.280204	0.759421	1.03398	0.65812	9
Os01t0267400-01	0.530212	1.60632	1.0917	1.27499	0.82478	1.31229	5
Os01t0267600-01	59.8413	44.9237	35.3892	57.3256	35.7747	30.8715	8
Os01t0267900-01	1309.29	1089.46	841.697	1396.52	1099.92	423.313	2
Os01t0268300-01	41.4666	18.0654	22.6835	78.4982	31.8141	20.5289	7
Os01t0268900-01	0.568741	0.564172	0.549724	1.04138	0.573881	0.255689	7
Os01t0269000-01	1.46268	1.34216	1.54782	2.33054	1.25613	2.1166	7
MSTRG.1248.1	0	0	2.32837	0	2.37774	5.41488	6
Os01t0269500-01	1.97086	2.32732	1.24818	0.957024	0.88657	0.746427	5
Os01t0270300-01	14.2329	14.1186	10.3649	16.3518	12.7877	5.97093	2
Os01t0271500-01	254.212	205.812	190.084	252.17	230.533	195.781	2
MSTRG.1260.1	1.80856	0	0	4.88201	0	0	2
Os01t0271700-01	0.796141	0.789745	0.380975	1.57923	1.17876	0.625166	7
Os01t0272600-01	0.387281	1.34459	0.370648	1.24096	0.976951	2.20033	6
Os01t0272850-00	2.74338	1.918	2.57163	3.13375	1.93731	2.39225	2
Os01t0273100-01	472.968	191.014	58.4434	367.751	58.9225	41.1293	8
Os01t0273200-00	1.02617	1.47951	0.661236	2.36598	2.3634	1.19593	9
MSTRG.1269.2	6.64216	8.67002	4.51023	7.57427	7.03477	8.39467	5
Os01t0273300-01	135.961	137.409	121.385	115.822	124.716	110.296	5
Os01t0273800-01	0.901603	1.34154	2.15721	1.06194	3.11477	4.24788	6
Os01t0274300-01	3.41905	6.4599	1.624	5.27731	2.44686	2.63872	5
MSTRG.1277.1	0.508385	1.15651	2.55041	0.457444	0	18.7798	6
Os01t0275200-00	4.09648	2.29827	1.8307	3.30445	4.02112	2.75378	9
Os01t0275300-01	40.0103	40.6014	24.0577	56.7144	37.9514	42.9985	7
MSTRG.1281.1	0.386134	1.6415	0.550225	0.536398	0.994817	1.16101	5
Os01t0275500-00	0.934345	1.3708	1.24177	1.21178	3.06406	1.6508	4
Os01t0275600-01	541.929	295.125	304.986	772.959	579.77	285.285	7
MSTRG.1283.4	2.50388	1.4144	1.26866	1.91021	1.28697	0.794592	8
Os01t0276033-00	7.39655	3.20121	2.14607	3.04908	5.82021	1.94072	8
MSTRG.1284.2	4.85911	2.79056	2.00477	8.81983	3.83698	1.60964	7
ENSRNA049471251-T1	300.077	201.838	227.746	278.329	124.477	150.839	8
ENSRNA049471325-T1	42.5393	56.2633	27.4112	33.403	14.3079	18.5912	5
ENSRNA049471273-T1	17.8151	21.6614	30.5677	48.5516	24.6334	11.2196	7
Os01t0276000-01	232.351	215.14	140.748	250.884	144.943	130.709	2
Os01t0276066-00	6.00847	4.49047	3.09285	5.94832	5.97561	5.05798	9
ENSRNA049471342-T1	25.0037	26.0588	21.999	42.088	37.3004	20.0916	7
Os01t0276100-01	280.141	282.118	274.822	284.076	366.684	295.015	4
MSTRG.1292.1	5.11939	5.40703	4.25537	4.53161	3.80774	6.59689	6
Os01t0276400-01	53.0611	56.9046	48.3227	51.1502	46.562	42.2015	5
MSTRG.1295.2	1.01975	1.77131	1.74973	2.18735	2.52251	2.38371	4
MSTRG.1298.2	4.40496	2.98235	3.25469	7.59229	3.76175	2.36084	7
Os01t0277100-01	2.2812	3.96003	2.18323	3.22427	1.49495	1.49546	5
MSTRG.1301.1	5.85612	7.46852	6.6758	7.5927	4.54491	7.23132	5
Os01t0277500-01	2.35281	1.91976	0.927196	3.16767	1.5027	0.604861	2
Os01t0277600-00	39.7947	41.3241	31.57	40.8844	45.1997	42.3636	9
Os01t0277700-01	168.103	203.11	210.203	208.774	245.627	217.554	4
MSTRG.1305.1	10.0775	15.1059	10.7163	10.6612	8.36082	9.7872	5
Os01t0278600-02	0.898731	1.41373	0.704477	1.34779	1.67227	1.04042	9
Os01t0278900-01	156.158	174.07	236.606	194.551	276.83	270.049	4
Os01t0278950-00	3.51388	4.22188	1.12099	3.82583	1.66998	1.25131	2
Os01t0279000-01	0.317457	0.610272	0.202549	0.290635	1.38808	0.0951461	9
Os01t0279100-01	58.1502	36.3625	65.4893	83.5575	131.208	51.7833	9
Os01t0279200-02	66.4676	45.2326	52.2475	82.6021	66.5317	40.5908	7
Os01t0279300-01	1525.01	1346.05	1403.57	1110.73	1725.75	985.558	9
Os01t0279400-01	24.9494	14.5206	12.822	20.4455	19.2879	10.9801	8
Os01t0279800-01	396.191	419.338	340.049	418.842	357.222	360.267	2
Os01t0279800-02	12.6761	9.56672	5.91788	17.7708	16.7492	12.2315	9
MSTRG.1321.1	0.932868	0.416672	0.68599	1.2106	0.847685	0.503574	2
Os01t0280400-00	103.985	56.9563	56.6588	133.245	82.8493	63.5639	2
Os01t0281000-01	81.0071	94.7642	71.3724	96.1869	91.9686	86.406	7
Os01t0281200-01	9.29484	17.0782	8.65383	5.79473	12.9574	5.53246	5
Os01t0281400-00	513.482	674.369	655.035	555.672	676.663	537.311	1
MSTRG.1332.1	0.453311	3.1496	3.49456	0.274525	6.58145	10.9703	6
MSTRG.1334.2	1.9358	1.3955	0.8337	2.00847	2.28348	1.36807	9
Os01t0283000-01	1.46651	1.52839	1.7871	1.93577	0.82917	1.70588	2
Os01t0283500-02	28.7748	48.7122	43.3889	37.1573	27.9182	27.2932	5
Os01t0283500-01	1.91972	2.73113	3.06213	3.31632	3.6344	1.43841	9
Os01t0283600-00	17.4717	21.0902	20.5933	15.1387	17.5774	5.00314	5
Os01t0284300-00	0.547289	4.07169	3.75393	0.250524	4.59176	6.01659	3
Os01t0284500-01	85.4412	137.362	71.9765	45.4881	93.5813	53.6499	5
Os01t0284700-01	0.236212	0.529604	0.48636	0.233847	1.3011	2.33853	6
MSTRG.1346.1	21.3405	27.1154	25.7257	17.8492	21.5801	50.8374	6
MSTRG.1347.2	1.00739	1.33239	1.94741	0.871005	1.76047	4.40266	6
MSTRG.1349.1	11.4465	6.97479	4.98386	13.0299	5.55224	3.12873	2
MSTRG.1350.3	0.297962	0.902701	0.306751	1.21801	0.473819	0.368732	7
Os01t0286100-01	8.74333	12.0533	8.51468	9.77373	18.6246	17.0586	4
Os01t0286200-01	0.679904	1.60575	0.545657	1.54071	0.778522	1.16817	5
Os01t0286550-00	0.718789	1.42603	0	0	0	0.646292	5
MSTRG.1355.1	0.263459	0.199543	0	0.239327	0.72559	1.24441	6
MSTRG.1356.1	6.74261	4.38243	5.16779	10.4843	1.78717	3.00346	2
MSTRG.1357.1	1.42608	1.41462	2.72967	1.00782	1.75953	3.42787	3
Os01t0287600-01	0	1.06581	4.00126	0.76698	0.895091	8.35886	6
MSTRG.1359.1	4.00409	3.03269	1.74401	5.64108	6.70775	3.11139	9
MSTRG.1359.5	4.69566	5.63125	3.32685	12	13.7028	7.84013	9
MSTRG.1360.1	2.28019	8.22528	4.28962	3.37869	10.3966	4.43304	4
MSTRG.1364.1	1.76165	5.00725	3.90322	1.10983	3.81991	12.5011	6
MSTRG.1365.4	0.743062	0.779242	1.21104	0.485722	1.24708	1.51535	3
Os01t0290901-00	0	1.08199	2.08781	0	0	4.28254	3
MSTRG.1368.1	4.6775	11.212	21.5827	6.81401	16.2062	25.9823	3
Os01t0292200-01	1.95598	1.49179	1.19873	4.07982	4.23225	2.29136	9
Os01t0293000-01	94.5015	99.4655	115.767	99.267	170.062	182.462	4
Os01t0293100-01	214.546	155.765	85.7766	157.296	157.291	84.6835	8
Os01t0293200-01	9.56614	9.41951	4.51033	13.5871	7.16846	3.75589	2
Os01t0294700-01	3.04689	20.7566	43.2919	0.405291	27.9925	42.6113	3
MSTRG.1379.2	3.62738	3.16671	2.39051	7.2705	5.18651	2.37202	7
Os01t0296166-00	3.97699	8.99005	10.8663	3.50771	12.3604	8.47717	4
MSTRG.1385.1	1.3456	1.77972	3.90181	1.16343	4.89899	2.72223	4
Os01t0296700-01	1.56099	2.58065	5.27254	0.156064	2.2361	6.70503	3
MSTRG.1387.1	0.930797	3.29744	1.76847	0	0	2.87344	3
MSTRG.1388.1	26.1107	38.1698	38.255	13.7831	19.6907	50.21	3
MSTRG.1389.1	24.0561	49.9103	8.13951	12.3022	18.972	12.0427	5
MSTRG.1392.1	4.41697	3.85123	4.54726	4.24856	4.05491	5.26363	6
MSTRG.1394.4	1.27799	2.62655	1.53496	2.12836	3.32414	1.93298	4
MSTRG.1394.6	4.41919	7.77108	5.2422	9.08526	5.61658	2.52857	7
Os01t0298500-00	1.47148	3.66351	2.34715	3.14337	2.14292	3.08716	5
MSTRG.1396.1	3.0035	3.05907	0.659789	3.65924	2.26653	1.71526	2
Os01t0299300-00	4.68298	3.38195	1.9772	4.21373	2.35565	3.57602	8
Os01t0299400-01	303.68	239.378	179.021	325.508	208.455	160.395	2
MSTRG.1399.2	21.6065	22.292	12.423	29.2768	31.7116	24.0834	9
MSTRG.1399.3	0.279279	1.10814	0.801855	1.27841	0.55133	0.877211	7
MSTRG.1403.1	4.0426	13.9701	7.67043	3.38239	12.0255	13.6775	3
MSTRG.1404.1	138.368	82.1652	106.235	214.959	134.947	47.9768	7
MSTRG.1405.1	5.61391	2.44773	0	3.99927	0	0	8
Os01t0300900-01	47.3381	35.9016	46.3702	90.1043	71.2717	26.9406	7
Os01t0301000-01	82.4834	45.4773	39.0243	89.4525	46.5784	36.9052	2
MSTRG.1409.1	0.344453	0	0	0	0	1.30158	6
Os01t0301300-01	1.2789	0.666436	1.51519	1.93626	2.21046	0.402715	9
Os01t0301700-02	0.442989	0.4708	0.841657	1.3951	2.2826	1.14168	9
Os01t0302000-00	13.1101	16.1451	3.93292	18.5314	48.8652	11.7155	9
Os01t0302800-01	4.54082	4.84507	4.89439	5.5623	4.76122	2.4497	7
Os01t0303000-02	45.3046	81.4937	201.516	46.2592	135.401	236.152	3
MSTRG.1417.1	0.857843	2.69883	1.81754	0.476669	7.48989	2.7291	4
Os01t0304000-01	655.15	525.382	495.36	800.007	607.64	498.399	2
MSTRG.1423.3	1.91208	1.42341	1.38695	2.43378	3.18538	3.52656	4
Os01t0305300-01	3.65814	6.15134	16.5525	2.41434	16.8052	44.792	6
Os01t0305900-01	45.0987	28.9559	48.8004	33.9106	18.2804	22.2846	1
Os01t0306100-01	38.2952	10.4922	3.65483	26.8386	5.68978	3.35369	8
MSTRG.1428.1	1.82153	3.34289	1.29781	0.773949	6.77418	2.41456	4
Os01t0307500-01	5.6247	14.3114	13.3888	3.56502	36.0163	37.5664	4
MSTRG.1432.1	0	0	2.80335	0	1.47781	2.63372	3
Os01t0307562-00	5.58596	5.96732	7.78929	5.70408	3.81716	2.70446	1
MSTRG.1435.1	0	2.4554	2.68452	0	1.8195	1.26104	1
MSTRG.1436.1	3.52017	6.29192	2.82511	2.4928	3.02307	3.02408	5
Os01t0308600-00	6.35514	9.13954	14.6205	4.16576	10.6231	6.03789	1
MSTRG.1439.1	2.73345	3.28117	5.55912	0.625624	1.72384	7.7808	3
Os01t0309800-01	2.25128	2.60698	3.52132	2.27229	2.52601	4.33377	3
Os01t0309900-01	51.9469	71.9097	61.8374	54.3161	55.7274	66.1245	3
MSTRG.1443.1	2.37535	1.79908	2.44542	1.17578	0	4.36274	6
Os01t0310032-00	1.28503	1.3476	1.22074	2.38013	1.65534	1.6559	7
Os01t0310100-01	0.507032	0.432536	0.244151	0.96948	1.03415	0.616094	9
Os01t0310800-01	1.64157	1.71084	0.937703	2.4377	2.26051	0.942195	7
Os01t0311100-00	4.99127	10.7945	10.0508	2.15777	3.69501	7.99836	1
Os01t0311300-01	1.81898	4.85213	6.59308	1.9659	3.97347	8.34708	3
Os01t0311400-00	21.2665	16.0685	23.5045	18.7101	11.8712	31.9715	6
Os01t0311600-01	0.886864	2.12914	4.07175	0	2.84501	9.10842	6
Os01t0311800-01	0.912512	11.8531	21.2381	0.704231	5.45901	16.6672	1
MSTRG.1455.1	1.42445	3.90829	2.99097	2.28726	4.4452	1.75771	4
MSTRG.1455.2	1.14338	2.91638	1.76183	2.52621	4.98921	2.75029	4
Os01t0312500-01	5.87011	21.1586	25.0804	5.18221	17.7695	22.7226	3
MSTRG.1457.1	3.10874	2.60808	2.9939	2.90591	2.15809	2.87907	8
Os01t0313300-01	36.3544	49.7571	96.9657	13.5966	21.3643	34.532	1
Os01t0314800-01	3.11955	7.21188	37.8172	0.951992	4.10557	2.44961	1
MSTRG.1466.1	2.86949	4.37393	1.20503	3.37763	0.827263	1.10575	5
MSTRG.1467.1	2.52936	6.68578	2.03732	3.08754	2.57846	2.9478	5
Os01t0315600-01	4.84101	8.60835	5.5435	7.79698	7.23024	3.73614	5
MSTRG.1469.1	5.39852	9.76561	7.72498	7.55299	8.39776	2.66582	5
MSTRG.1473.1	3.44254	0	4.36991	1.65564	0	0.710032	1
Os01t0316500-01	93.3812	118.301	80.9173	66.2874	58.2782	90.6494	5
MSTRG.1477.1	0	0.750178	1.08566	1.03854	0.6608	0.991532	3
MSTRG.1478.3	1.80255	1.29945	0.44157	2.04556	2.16568	1.21556	9
Os01t0316900-01	2.17288	1.53953	1.16256	1.0942	3.03281	2.20467	4
Os01t0317125-00	1.30994	2.64571	0.221708	2.59364	2.20469	0.360237	7
MSTRG.1480.1	4.66599	6.24682	9.34207	3.76854	7.39852	7.85132	1
MSTRG.1481.1	8.89239	8.71888	5.88746	14.267	20.37	10.3797	9
Os01t0317800-01	209.695	257.874	245.553	108.895	138.443	288.497	3
MSTRG.1483.1	2.049	2.04569	1.59206	2.4188	2.02832	0.230515	2
MSTRG.1485.3	3.64008	2.09928	1.42673	3.66578	3.23368	1.27268	2
Os01t0318700-01	0.697885	1.3416	0.674549	2.19199	0.938922	1.01667	7
Os01t0319200-00	0.449877	1.40658	0.904719	0.649085	0.699813	1.11346	3
MSTRG.1491.1	8.58146	0.962012	1.76692	9.35449	1.57561	0.810667	2
MSTRG.1492.1	0	0	1.97482	0	0.555474	3.87931	6
Os01t0321300-00	0.822489	0.537856	0.278415	0.922984	1.23526	1.03598	9
Os01t0321700-01	1.19244	1.33153	1.05224	1.85694	2.64989	0.772969	9
MSTRG.1495.2	3.71576	4.86579	3.42826	9.27767	2.55636	1.67049	7
MSTRG.1496.1	30.8244	24.8466	20.5902	23.1682	13.734	18.4211	8
Os01t0322300-00	1.61528	0.7874	0	2.74525	0	0	2
MSTRG.1498.1	2.40096	2.50228	1.89637	7.65897	4.9798	0.880363	7
Os01t0322700-01	7.51827	4.45636	3.68969	10.5555	13.3188	4.79326	9
Os01t0322800-01	117.874	55.3933	63.0776	130.775	73.6976	52.6232	2
Os01t0323000-01	120.694	83.1497	133.477	113.19	186.196	78.0958	9
Os01t0323100-01	5.08816	7.83183	9.24224	6.78866	9.19157	5.72776	1
Os01t0323300-00	15.3909	11.3273	13.146	20.1509	13.159	18.0817	7
MSTRG.1507.3	3.13917	2.79125	6.0087	4.67015	11.4823	12.231	4
MSTRG.1509.1	0.400255	2.73157	0	4.08153	0	0	7
MSTRG.1510.2	1.22966	1.22739	1.17685	2.9443	2.61422	1.87107	9
MSTRG.1511.1	4.76579	3.37666	1.79314	4.71708	2.77403	5.32241	8
MSTRG.1513.1	6.18581	9.7083	10.0508	9.51992	3.40725	9.08904	1
MSTRG.1514.1	8.13851	11.9019	17.8624	3.45796	6.98923	12.8179	1
MSTRG.1515.1	4.90196	8.48624	5.04655	3.18067	11.5718	1.9846	4
MSTRG.1516.1	5.21261	0.427835	0	0.346685	2.77047	0.31486	8
MSTRG.1517.1	2.94436	3.39649	0.279706	4.36284	1.42819	0.908946	2
MSTRG.1518.1	6.49416	8.51294	2.31348	6.57385	7.24543	8.77098	6
Os01t0326000-01	0.45967	0.723076	0	2.68846	1.18427	0.609321	7
Os01t0326300-01	0	0	1.30488	0	0	0	1
Os01t0327400-01	12.9499	25.6918	39.1154	10.397	18.4337	52.4787	3
Os01t0327500-01	81.8347	25.4565	22.6251	55.2238	8.17594	22.2692	8
MSTRG.1528.1	0.61442	0.23268	0	1.18199	0.318591	0.290213	2
MSTRG.1529.1	3.34237	1.60632	0	1.01999	2.24838	0	8
MSTRG.1530.2	6.76416	4.5895	6.01044	7.80873	9.83202	7.24708	9
MSTRG.1530.6	4.3714	5.98506	1.87812	6.4688	5.7109	3.46774	7
Os01t0328400-01	1134.57	766.743	790.763	1156.9	910.623	557.795	2
Os01t0328500-01	98.189	86.488	76.1076	91.5283	87.1362	72.1908	8
Os01t0328600-01	1.70447	1.59876	0.856938	2.29527	5.47959	2.50444	4
Os01t0328700-01	245.288	207.421	245.633	233.293	365.793	263.157	4
Os01t0328900-01	53.5066	48.6191	49.0485	60.9229	48.5541	48.7577	2
MSTRG.1538.1	1.10791	1.15466	0	0	2.34906	0	4
Os01t0329400-01	7.28323	6.67087	6.13124	15.8032	14.0522	9.17719	9
Os01t0329800-01	26.4825	17.3113	12.69	29.3816	24.6999	23.7106	7
Os01t0329900-02	3.49638	1.92683	1.85901	2.92848	0.383459	1.74652	8
Os01t0330001-00	3.15823	1.656	2.97072	1.42088	1.35612	4.06972	6
MSTRG.1545.1	1.03097	0.214895	1.24399	1.4289	1.09296	0.189355	7
Os01t0330100-01	48.0427	27.6095	16.5316	62.487	25.7893	14.5016	2
Os01t0332100-01	2.94127	2.61822	4.55683	6.21364	1.90234	3.27729	7
Os01t0332200-01	7.98495	19.3971	23.0691	4.6044	14.2045	21.0689	3
Os01t0332500-01	60.5163	32.1265	10.7872	56.0732	24.476	7.76141	8
Os01t0332900-01	7.22356	5.32296	2.96286	8.07063	10.8202	9.11009	9
MSTRG.1558.1	0	0.743866	1.32883	0	1.38722	4.91595	6
Os01t0335700-01	34.2702	26.6843	27.3119	28.6491	34.6651	25.5612	9
Os01t0337500-00	0.360641	12.4792	23.0877	0.207878	6.28888	20.2126	3
Os01t0337600-01	1.00993	0.611933	0.415887	2.56877	1.07066	0.57243	7
Os01t0337700-02	3.82064	5.71077	3.93334	7.87493	5.84577	9.8576	6
Os01t0337900-01	153.717	122.824	114.886	171.839	163.494	116.583	9
Os01t0338000-02	0	1.2137	0.824586	0.245872	0.248478	0.255689	1
Os01t0338150-01	4.38444	5.01976	3.00281	3.92304	4.86429	3.53309	5
MSTRG.1568.1	6.03252	7.70455	5.12404	8.28425	8.76164	9.61542	4
MSTRG.1569.3	2.29899	2.63136	2.07944	2.44645	3.92575	3.70981	4
Os01t0339400-00	56.4391	40.0663	31.1572	48.7797	19.5099	69.5069	6
Os01t0339600-01	6.92193	6.99387	4.14334	6.06074	5.86612	6.22819	5
Os01t0339900-01	118.23	93.4721	113.672	104.262	134.089	80.0212	9
MSTRG.1576.1	6.47602	11.4604	11.7911	3.1255	4.14045	10.2255	1
Os01t0341200-01	15.4731	17.4542	18.3738	16.0898	12.9384	17.8399	1
Os01t0342500-00	0	0.803162	1.59941	1.44493	2.81048	11.199	6
MSTRG.1581.1	6.82362	6.28849	3.78362	9.76629	6.57033	7.02168	7
Os01t0342800-01	5.26791	6.48843	3.37081	7.58571	4.83609	8.79585	6
Os01t0342750-01	7.57053	6.15152	3.09653	12.5759	5.85496	5.3026	7
MSTRG.1584.1	4.91267	0	0	4.62907	0	0	8
Os01t0346600-01	0.606369	2.49245	5.82638	0.583249	4.7141	5.75413	3
Os01t0346700-01	59.4635	56.0565	55.4505	39.0779	37.5697	71.1664	3
Os01t0348600-01	196.803	94.2	207.481	201.938	294.644	98.7082	9
Os01t0348700-01	1671.25	1223.88	1141.85	1573.3	984.977	806.616	8
ENSRNA049472760-T1	10.6348	17.5823	6.78539	33.403	21.4618	13.9182	7
ENSRNA049472690-T1	27.9362	6.713	4.45608	17.549	18.7925	0	8
Os01t0348900-01	1.30227	2.91979	9.69812	0	10.8041	13.1552	3
Os01t0349400-01	130.217	152.297	127.665	146.345	123.106	107.911	5
MSTRG.1602.1	12.7985	16.1059	8.42702	13.051	6.20802	11.3101	5
MSTRG.1606.1	0.828545	0.875098	0.797939	1.05612	1.47361	1.22032	4
Os01t0351800-01	10.6476	8.76986	10.7994	8.23699	8.67041	11.5926	6
Os01t0352100-01	1.35642	1.12122	1.28856	0.813668	0.38829	0.799119	5
MSTRG.1611.1	5.2091	3.94536	6.70344	2.57847	2.39105	1.23022	1
MSTRG.1612.1	5.89124	2.67721	2.42601	1.13332	2.4982	3.33918	8
MSTRG.1615.1	2.94993	2.19467	0.963521	4.27609	1.50359	3.28159	2
Os01t0355100-01	6.27695	6.03333	4.10043	8.70068	5.74586	4.03133	7
MSTRG.1618.1	17.5706	19.333	6.25691	22.075	10.2644	7.20629	2
Os01t0355500-02	23.7064	25.7721	20.1075	26.9176	28.3825	31.6737	6
MSTRG.1620.1	31.6958	17.5884	25.3236	43.963	44.0498	14.9259	9
MSTRG.1622.1	1.38172	1.05844	0.74268	1.91942	0.762817	0.990203	2
Os01t0356400-01	32.3829	28.9556	66.8011	29.8512	48.2788	16.9917	1
MSTRG.1624.1	5.68821	5.54567	4.32292	5.80046	6.62189	3.51199	9
Os01t0357100-01	5.81728	3.19414	3.78888	5.36709	5.12245	3.36454	8
Os01t0357900-01	256.753	514.58	746.984	203.625	303.24	417.797	1
MSTRG.1631.1	5.68667	13.0022	9.42261	2.97497	11.3575	12.7584	3
Os01t0358100-01	39.7794	139.157	153.797	17.7551	59.6383	135.421	1
Os01t0358300-03	0	1.08578	0	0	0	0	5
Os01t0358400-01	7.97338	8.25666	4.66123	8.33921	4.76008	6.84971	2
MSTRG.1636.1	0	1.22797	0	0	1.2219	1.08203	4
MSTRG.1641.1	1.3422	1.06078	0.762823	2.19535	1.08933	1.26794	7
MSTRG.1642.1	2.94452	2.36133	1.48088	4.41563	2.66248	2.1429	7
Os01t0360200-03	0.852658	2.07823	1.62001	0.452856	2.32539	2.91982	3
Os01t0360200-01	20.3522	11.6225	23.4547	35.9343	46.5018	5.37662	9
Os01t0360600-01	145.575	120.23	137.817	160.161	146.695	103.786	2
Os01t0361500-01	3.30986	1.64164	0.933097	4.41829	1.08901	1.94929	2
Os01t0362000-01	4.23991	3.89011	3.07411	4.11025	6.34098	5.54512	4
MSTRG.1651.1	1.65933	3.5886	3.17614	1.56354	0.837164	5.21194	3
MSTRG.1652.1	1.46945	1.541	1.41517	5.28884	5.70218	1.13408	9
MSTRG.1659.1	4.16929	2.55602	2.57358	7.15566	5.51064	2.62574	7
Os01t0369200-01	122.791	120.987	40.6092	133.792	73.8207	64.6839	2
Os01t0371200-01	4.49317	11.461	13.8221	3.32989	10.454	43.095	6
MSTRG.1680.1	0	0	2.902	0	1.72519	9.76392	6
Os01t0372350-01	1.26168	3.16301	2.91079	5.8422	2.09825	1.53014	7
MSTRG.1682.1	5.14706	6.07798	4.03456	6.17508	2.55222	2.27425	2
Os01t0372700-01	3.09144	4.5683	3.32729	4.86583	4.32013	4.9037	6
Os01t0373500-01	3.61337	1.06203	1.94031	2.31421	1.45307	11.6976	6
MSTRG.1686.1	0	0	1.50087	0	0.515178	9.18137	6
MSTRG.1687.1	8.69693	7.46187	3.51892	8.74439	4.58001	4.3723	2
Os01t0374900-01	98.2345	95.8687	104.105	96.329	81.1181	81.4663	1
Os01t0375000-01	241.1	151.63	146.015	223.772	161.722	140.809	8
Os01t0375200-01	0.163441	0.342797	0.465793	1.2109	0.421081	0.288868	7
Os01t0375200-03	0.237048	1.1962	1.16139	0.651058	1.40388	1.30298	3
Os01t0376200-01	2.42292	2.3622	1.13953	3.3658	2.35052	2.14115	7
MSTRG.1693.1	23.375	20.8035	11.0474	22.8413	13.9574	15.6358	8
MSTRG.1694.1	4.28068	0.385738	0	4.89876	0	0	2
MSTRG.1695.1	0	0	0	1.18886	0	0.827112	7
Os01t0376700-01	80.3231	81.558	96.9451	89.5716	118.725	87.499	4
Os01t0377000-01	0	0.520373	1.17147	0.604756	0.352885	1.72948	3
Os01t0377500-01	174.024	154.403	135.899	208.046	157.241	139.816	2
Os01t0377700-01	0.710672	1.29183	0.714594	1.68854	2.10954	2.11072	4
Os01t0377700-02	30.3184	37.1602	27.8437	28.3848	30.2454	43.62	6
Os01t0378100-01	0.754436	3.78273	3.07155	0.484885	8.67816	14.0734	6
MSTRG.1702.1	0.927871	1.40553	3.82096	0	0.962243	0.765503	1
MSTRG.1703.1	7.82329	4.68811	2.1234	5.02812	5.54179	0.987644	8
Os01t0379400-03	0.446207	1.7401	0.859448	0.631962	0.510928	1.49226	3
MSTRG.1705.1	0	0	0.381462	0	0.11609	2.74757	6
MSTRG.1708.1	0	0.424846	0.577475	0	0.581709	1.94295	6
Os01t0382400-01	0.423203	0	1.22271	0	1.23167	0.653229	4
MSTRG.1716.1	0	0	3.37017	0	0.90498	7.6362	6
MSTRG.1717.3	3.2994	3.46004	2.95523	6.54766	6.63842	5.83081	9
MSTRG.1718.5	0.913596	0.714111	0.235136	1.58279	1.25806	0.629241	7
Os01t0383001-00	0.331013	1.03494	1.00844	0.983097	0	1.21593	3
MSTRG.1720.1	5.51893	1.23738	1.13635	0	4.5787	0.910636	8
Os01t0383700-01	2.61372	3.27902	3.23719	4.05446	4.29894	6.70468	6
Os01t0384300-00	29.0131	27.4177	29.9762	19.458	28.5697	41.3633	6
Os01t0384800-01	28.3472	63.632	68.2764	12.5845	15.7965	35.0434	1
MSTRG.1728.4	3.18411	3.04194	1.61675	4.20298	3.85241	0.974696	7
MSTRG.1730.1	15.6273	13.0973	17.8208	14.9636	11.5569	13.9982	1
Os01t0388101-00	0	2.29556	0.693157	0.675738	0.723617	1.68939	3
MSTRG.1731.1	0.971381	1.68729	1.33338	2.18013	1.00736	0.764697	7
Os01t0388700-01	2.05914	3.75156	5.94923	1.58812	5.83454	8.05859	3
Os01t0389700-01	0	3.41845	2.94648	0	3.3433	5.62514	3
Os01t0390300-01	4.73232	4.77608	2.92741	6.41208	5.45821	6.12187	7
MSTRG.1737.4	1.28694	1.11329	0.492669	1.78034	1.52435	1.85142	9
MSTRG.1737.6	0.54342	0.597816	0.303566	1.06956	0.480082	0.323792	7
Os01t0390900-01	53.0913	31.2688	38.5235	46.2036	65.8258	27.2975	9
Os01t0390900-02	6.17193	6.28135	4.26898	11.8826	10.6237	6.52874	9
MSTRG.1740.1	6.75323	6.06074	2.99385	6.25417	6.11468	5.96789	2
MSTRG.1741.3	0.259315	0.815824	0.243919	0.661081	0.222696	1.00066	6
MSTRG.1743.1	1.4714	0.297861	1.38404	1.5131	0.416919	0.973355	8
Os01t0392100-01	20.4303	27.7566	25.0637	31.9317	36.8415	37.7991	4
Os01t0392800-01	8.09375	6.47091	4.45161	10.238	14.3399	8.79807	9
MSTRG.1747.3	3.9623	2.60171	1.60436	5.85984	4.45942	2.60348	7
MSTRG.1748.1	3.03753	1.70259	0.781783	3.7589	2.36254	2.09211	2
MSTRG.1749.1	0	0	0	29.3479	17.125	26.8864	9
MSTRG.1750.2	0.728264	1.0183	0.461221	1.4613	1.53076	0.834176	9
Os01t0496900-01	1.85466	1.24788	1.1951	3.39593	2.74476	2.00112	7
MSTRG.1752.5	3.74085	1.61339	0.933964	3.93754	3.44643	4.53348	9
MSTRG.1752.10	4.80656	1.80868	1.38058	4.32494	4.90836	3.25989	9
MSTRG.1759.1	9.89164	7.18973	3.59896	11.8626	7.3429	4.17255	2
MSTRG.1760.1	6.16904	6.90705	3.03744	6.09126	5.97131	4.18736	5
Os01t0500600-01	18.0879	16.897	8.4528	26.5672	13.9709	10.8938	2
Os01t0500825-00	1.07774	2.0407	1.10954	1.81414	1.71383	1.52717	9
Os01t0500900-01	29.7507	31.6744	30.9368	24.0407	49.845	44.231	4
MSTRG.1767.1	7.86611	8.30632	6.27867	11.381	7.16321	7.48341	7
MSTRG.1768.1	0.871155	0.488297	0.442333	2.01235	1.38531	1.06668	7
Os01t0501800-01	107.813	189.066	444.135	213.183	598.022	683.215	4
Os01t0502400-01	252.435	209.377	213.899	250.266	195.72	180.662	8
Os01t0503400-01	0.370797	0.602508	0.595165	0.735221	0.849159	1.80507	6
Os01t0503400-04	0.150856	0.735381	0.567599	0.512778	1.17079	2.46234	6
Os01t0503400-02	0.20868	0.43768	0.396481	0.193258	1.21467	1.44947	4
MSTRG.1774.1	12.4281	23.6181	18.1452	11.0844	12.8885	26.4722	3
Os01t0504100-01	78.8179	115.377	136.259	49.7582	64.8419	93.5338	1
Os01t0504500-02	12.2969	15.8859	21.9601	9.84384	19.0179	8.50449	1
Os01t0505500-00	16.3474	9.68985	10.61	15.7241	14.1281	8.06275	2
Os01t0505600-01	4.99284	18.951	30.8621	3.52986	26.2941	37.6838	3
MSTRG.1783.1	2.24312	7.15183	8.43978	1.34557	8.15668	3.53284	1
Os01t0507000-02	15.3456	9.90927	5.98633	16.5502	12.5216	12.3594	2
Os01t0507300-01	44.2831	37.4034	37.0812	43.9742	41.3298	50.9702	6
Os01t0507700-01	84.7854	107.382	184.626	83.3972	204.575	173.055	4
MSTRG.1791.1	2.24938	2.00433	2.28427	1.92315	5.21429	2.51074	4
MSTRG.1791.3	0.670149	0.664765	0.323871	0.579423	5.07154	1.31796	4
Os01t0508100-01	1.11174	4.08055	17.2546	1.50051	7.54965	17.1601	3
Os01t0508500-01	0.401784	8.52069	7.27203	0.795524	1.84425	9.59331	3
MSTRG.1795.1	1.53672	3.32343	0	1.44801	1.34276	0	5
Os01t0509400-01	17.2063	14.9728	16.1848	14.494	11.947	15.2571	8
MSTRG.1798.1	21.3766	26.1171	15.9373	19.0451	16.7128	15.2241	5
Os01t0510200-01	4.18322	2.59341	11.3127	3.99916	5.07278	5.24628	1
MSTRG.1800.1	7.72421	7.40615	5.96144	5.05219	7.20605	8.46434	6
MSTRG.1801.1	45.4917	32.4997	34.4616	65.4962	44.5324	28.0196	7
MSTRG.1802.2	2.08378	2.87734	2.81547	4.85098	4.94732	4.62893	9
MSTRG.1803.1	13.2302	8.5336	5.66459	10.17	7.37751	9.56879	8
Os01t0511100-01	31.1239	29.0845	39.4211	24.2577	46.1464	44.2357	4
Os01t0511300-01	253.849	182.849	188.203	253.34	225.345	194.899	2
MSTRG.1810.1	3.98549	6.2305	5.34331	5.26078	2.81677	3.66002	5
MSTRG.1812.1	2.22912	5.11101	3.6219	5.57473	4.2537	8.00199	6
Os01t0511700-01	6.58843	5.49316	3.3124	8.91405	11.4082	8.92094	9
Os01t0512200-01	6.15621	4.93538	5.16774	5.46598	3.33946	4.34882	8
Os01t0512400-01	29.6589	19.2771	10.2782	29.3946	20.1084	16.0921	2
MSTRG.1819.1	140.478	119.786	109.609	126.428	123.451	58.7786	8
Os01t0513200-01	1.19886	1.25437	1.13629	1.89898	2.34793	1.13253	9
MSTRG.1822.1	16.7539	10.4898	11.8422	12.9309	9.69233	11.8625	8
Os01t0513800-01	30.7789	21.3541	17.8946	36.8523	29.9238	20.4301	7
Os01t0513900-01	105.251	45.5246	27.5725	125.475	45.711	18.4715	2
Os01t0514000-01	464.754	383.561	258.058	450.352	254.391	212.318	8
Os01t0514600-01	177.85	144.108	153.972	166.13	194.027	111.498	9
Os01t0514700-01	0.606655	0.709744	1.16849	0.674188	0.601631	0.468198	1
Os01t0515300-01	8.86258	12.301	11.2966	7.27089	9.5647	7.51044	1
MSTRG.1838.1	5.42567	3.84419	3.86569	10.9845	3.94766	3.49579	7
Os01t0518400-01	2.13111	3.2086	1.66756	1.60357	2.40209	3.28945	3
Os01t0519100-01	0.233978	0.487704	0.475214	1.35034	0.992194	2.12338	6
MSTRG.1843.1	1.18614	2.35322	0	1.02556	2.39372	1.03677	9
MSTRG.1844.1	1.16098	1.61231	0.897725	1.75033	1.21733	1.87899	6
MSTRG.1845.1	0.996371	1.11697	1.02576	0.958381	0	1.88249	6
MSTRG.1846.1	17.4571	26.6285	26.8702	6.74303	3.14774	28.6305	1
MSTRG.1849.1	0.509732	0.265621	1.29409	3.78471	1.85015	0.234053	7
MSTRG.1850.1	26.4313	23.2566	19.9109	44.9338	27.9721	15.2203	7
Os01t0521500-01	1.49205	1.64375	1.53607	2.34845	2.24141	2.74042	6
MSTRG.1854.1	1.08364	1.6415	0	0	0.994817	0	5
MSTRG.1857.1	6.26411	2.37221	1.27225	7.96645	9.29711	0	9
Os01t0524251-01	8.5154	4.92202	1.80261	6.25081	5.46399	0	8
MSTRG.1859.1	8.88819	11.1034	2.20013	6.75794	8.03478	0.826797	5
MSTRG.1861.1	1.15808	0.603474	0.59612	3.12099	2.776	1.59526	9
Os01t0525500-01	1.36224	0.332026	0.32798	1.53218	0.292468	0.601912	2
Os01t0525700-01	132.089	154.724	122.034	195.368	224.792	155.176	9
Os01t0525800-01	74.0794	110.001	129.178	80.8679	188.51	246.236	6
Os01t0526200-01	114.001	67.425	58.0578	112.208	77.4892	70.4182	2
MSTRG.1869.2	0.449578	0.318534	0.640631	1.33714	0.89171	0.595944	7
Os01t0527600-01	58.2336	55.6409	54.6761	69.8234	60.2008	45.79	7
MSTRG.1874.2	10.2387	4.71129	3.19684	16.3531	4.80226	4.11334	2
Os01t0528300-01	0	0.443124	0.30116	0	1.07421	1.2067	4
MSTRG.1876.1	8.63679	5.96635	7.17913	3.99927	3.15228	5.19374	5
Os01t0528800-01	442.49	459.023	606.924	436.606	537.531	413.098	1
MSTRG.1878.1	3.37834	4.20804	1.50977	2.88847	4.13522	2.83682	9
Os01t0529800-01	155.744	223.277	262.242	87.6361	108.835	170.534	1
Os01t0530100-01	0.376515	2.40091	0.715358	0.959862	0.373397	0.332729	5
MSTRG.1882.1	73.4937	47.5509	30.8703	71.1229	35.8572	30.0526	8
Os01t0530366-01	446.38	339.886	415.323	444.705	377.145	361.945	8
Os01t0530400-02	0.483651	0.319843	0.155826	0.557563	1.13872	0.144956	9
MSTRG.1885.1	0	0.915697	0	0.742012	0.865952	1.12519	4
MSTRG.1886.1	4.5224	2.76293	2.24762	3.14997	0.715809	1.57531	8
Os01t0530650-01	4.85361	7.44077	6.05301	2.42374	3.56179	8.48482	3
MSTRG.1888.1	0.31722	0.36589	0.303597	1.13585	0.498926	0.342271	7
Os01t0531200-01	2.39022	2.71549	1.77991	3.31569	1.87659	3.59341	6
MSTRG.1889.1	43.938	41.5229	33.927	46.9969	39.034	25.2014	2
Os01t0531500-01	0.292267	0.85483	0.844412	1.24181	0.850602	0.774837	7
MSTRG.1891.1	3.3869	0	0	4.84322	0	0	2
MSTRG.1892.1	6.56746	0	0	7.51572	0	0	2
MSTRG.1893.1	1.22282	1.07822	0.787953	1.92038	1.37096	2.66726	6
Os01t0532200-02	3.89564	3.54875	2.26841	4.29495	2.54896	3.82473	2
MSTRG.1894.2	113.329	54.4164	56.982	162.79	81.2605	48.23	2
Os01t0533400-01	0	0.471129	9.90326	0	12.4195	203.456	6
MSTRG.1904.1	0	2.52164	2.61059	0	5.605	4.13138	4
MSTRG.1905.1	1.11484	1.00697	1.28308	2.21615	2.59275	1.34897	9
MSTRG.1909.1	0.991881	1.04018	0	0.892492	0	0	8
Os01t0535100-00	0	5.43616	4.27792	0	6.00713	3.4691	4
Os01t0536400-01	0.815711	1.37166	1.25966	0.201886	0.864762	1.92645	3
MSTRG.1917.1	35.6302	23.716	22.5437	20.5762	14.5583	17.042	8
MSTRG.1919.1	2.0548	0	0	4.06846	1.08918	2.8305	7
MSTRG.1920.1	4.47167	5.01289	6.35742	4.87448	0.948113	1.6897	1
MSTRG.1922.1	0.690165	0.736407	1.32105	0	0.681234	1.62585	3
MSTRG.1923.1	6.93594	5.79612	1.55337	7.34101	2.26914	1.01961	2
Os01t0539900-01	1.02645	0.598017	0.536395	1.23147	1.66506	1.00787	9
MSTRG.1927.1	6.97538	5.63534	3.11183	5.59118	3.13464	2.63578	8
MSTRG.1928.10	5.75071	5.82695	3.17208	10.5093	4.07918	2.29507	2
Os01t0540800-01	7.54515	5.18279	2.43796	14.1026	12.5372	5.99374	9
Os01t0541600-01	28.7534	29.1882	26.3019	28.0412	19.8983	28.4224	5
MSTRG.1930.1	4.44368	5.81336	3.6558	4.77058	3.42611	1.85491	5
Os01t0541800-01	35.5196	53.362	78.5807	26.9276	60.7731	39.2099	1
Os01t0542000-00	195.53	200.097	236.352	159.066	135.427	138.174	1
MSTRG.1936.1	1.77717	5.03663	6.07774	3.62084	5.49433	7.40644	3
Os01t0542700-01	7.13685	20.0895	19.9826	8.0009	7.65239	18.5887	1
Os01t0543000-02	46.0589	42.8524	22.5379	76.4654	34.1039	22.127	2
Os01t0543100-01	1018.62	872.284	951.175	763.402	979.17	918.208	4
MSTRG.1940.1	1.83293	3.27616	2.35362	1.55758	0.889079	3.53649	3
MSTRG.1941.1	3.62036	2.60989	0.291609	3.12709	1.52212	1.58223	8
MSTRG.1942.1	5.74681	4.29492	2.26953	4.64036	2.64875	1.84379	8
MSTRG.1943.1	5.27619	0.475445	0	4.56188	0	0	8
Os01t0544450-01	182.695	48.6412	24.216	167.416	34.6147	21.4534	8
MSTRG.1945.4	0.906345	0.256865	0.172201	1.54038	0.179768	0.139898	2
MSTRG.1946.1	2.91097	0.650101	1.88166	4.39996	0.572647	2.40158	2
MSTRG.1947.1	10.1453	32.5177	71.4962	7.25278	105.764	60.0285	4
Os01t0545900-00	7.44966	6.9552	7.29975	9.94445	7.20007	6.55874	7
Os01t0546000-01	1.0843	0.810362	0.372096	1.61017	1.12447	0.165959	7
MSTRG.1951.1	0.201002	1.39571	0.393914	0.368038	1.21691	1.62656	3
Os01t0546400-01	1.33587	1.96127	2.2618	0.240402	1.58977	2.12493	3
MSTRG.1952.1	4.62685	3.78816	2.83258	4.47537	1.83541	1.19029	8
Os01t0546500-01	2.56753	1.91769	1.47436	1.64542	1.29536	1.4113	8
MSTRG.1953.1	6.68847	5.12944	2.90056	5.60225	4.74513	4.18526	8
Os01t0546800-01	70.2236	84.7947	111.388	47.0826	77.948	102.39	3
MSTRG.1955.1	4.3202	4.10693	4.47922	7.46314	7.44704	5.50299	9
MSTRG.1958.1	5.3485	5.44143	4.02207	6.88284	6.02437	4.39523	7
Os01t0547600-01	0.359052	1.01758	0.675469	0	2.13647	6.09632	6
MSTRG.1962.1	3.85129	0	0	2.82072	0	0	8
MSTRG.1963.1	7.86947	0	0	5.57275	0	0	8
MSTRG.1964.1	1.72627	1.40086	2.03108	1.89766	1.17648	0.566178	2
Os01t0548750-00	0.340934	1.45511	0.326292	0.936385	0	0	5
MSTRG.1965.1	2.36426	3.71906	3.7	3.01364	3.22394	4.31603	3
Os01t0549200-01	2.0164	1.88257	1.12572	4.46126	2.40496	1.64935	7
MSTRG.1969.1	19.1536	3.04648	0	13.3941	0.379209	0	8
Os01t0550000-02	5.06492	10.7658	4.81155	11.6467	5.79957	6.28498	7
Os01t0550200-00	69.6997	57.7602	52.9536	86.7937	52.0296	49.5123	2
MSTRG.1979.1	1.81007	3.73705	2.00307	1.91612	2.37742	9.86089	6
Os01t0551000-01	6.87961	49.9365	71.0634	6.92953	30.9089	152.193	3
Os01t0551100-01	1.20167	4.103	2.82598	2.70137	3.15	9.4361	6
MSTRG.1984.1	2.05911	3.71098	2.95601	2.67051	1.52435	2.77714	5
Os01t0551400-00	7.80284	6.42009	4.95531	9.48041	4.25889	9.42847	2
Os01t0552500-01	4.58106	7.01841	4.76635	2.78063	3.59766	3.36716	5
Os01t0552850-01	1.85075	1.42791	1.77127	2.66699	1.45248	2.03388	7
MSTRG.1993.3	5.4858	5.3235	3.70625	8.56505	6.40014	2.75309	7
MSTRG.1996.1	1.0796	3.39649	2.07944	0.97142	2.14132	1.85491	5
MSTRG.1997.1	0	3.70182	0	0	0	0	5
MSTRG.1998.1	5.54011	10.4674	3.33466	4.31554	6.04638	5.16645	5
Os01t0555200-01	38.0833	33.6184	27.3336	40.4322	48.1697	23.1547	9
Os01t0555300-01	150.054	161.31	180.024	117.206	173.094	196.162	3
MSTRG.2003.1	15.871	24.1235	16.9322	27.229	27.4887	22.1623	9
Os01t0556650-00	1.13027	5.60595	10.0961	1.20724	11.1564	45.9392	6
Os01t0556700-00	0	1.12527	3.79982	0	6.29547	9.1797	6
Os01t0557100-01	0.588872	1.85263	3.0465	0.272677	2.02286	3.54119	3
Os01t0557400-01	23.6104	21.8452	17.2587	31.6574	13.5792	17.3721	2
Os01t0557500-01	134.989	125.294	145.092	165.154	209.796	118.421	9
Os01t0558300-01	239.725	201.337	208.864	207.623	225.027	196.738	8
MSTRG.2015.1	0.617937	1.17006	1.24269	2.80667	2.94793	2.29412	9
Os01t0558800-01	31.6019	31.9066	24.3379	32.1675	28.9332	49.5457	6
Os01t0558825-00	3.98549	15.5763	6.01122	15.7823	16.5325	19.2151	4
Os01t0559000-02	6.80313	7.56289	4.20228	23.6474	9.09329	8.10716	7
MSTRG.2022.1	0.911482	0.486276	0.436168	1.50301	0.995544	0.199176	7
MSTRG.2025.2	0.726555	1.10058	0.737823	1.43856	1.54049	0.999025	9
Os01t0559600-01	24.398	25.1077	36.7218	25.6728	42.6205	25.9284	4
MSTRG.2026.2	3.17402	4.487	3.20961	4.40919	4.61877	5.75006	6
Os01t0559750-01	27.0572	45.8359	28.8768	20.7208	27.7048	52.2992	3
Os01t0559900-01	62.3819	99.2855	64.3316	61.2787	116.374	114.575	4
Os01t0560000-01	55.0705	40.738	60.0212	52.9942	55.6827	31.2988	9
Os01t0560200-01	195.608	220.966	246.168	200.729	266.254	195.762	4
MSTRG.2034.1	5.031	7.15061	4.06508	6.3082	3.44719	4.15856	5
Os01t0562400-01	3.06553	3.43657	3.60681	2.16774	2.11939	2.62012	1
MSTRG.2035.1	4.6612	5.82948	7.57359	2.69009	2.41694	4.40331	1
Os01t0565600-01	18.9868	17.114	19.8814	36.2267	34.4062	13.849	9
MSTRG.2039.1	62.2862	68.0163	57.168	50.7994	38.748	55.8153	5
Os01t0565800-00	4.60003	9.045	9.83229	3.42038	9.38228	15.7522	3
Os01t0565900-01	2.29258	4.89237	4.23152	5.54704	3.86334	3.21471	7
Os01t0566000-01	79.4853	131.526	44.2904	61.4739	57.0987	69.7057	5
Os01t0566200-01	4.54503	8.04226	7.9088	2.14348	6.85963	17.461	6
Os01t0566701-00	5.89601	5.15257	2.80053	3.6402	2.85992	4.34196	5
Os01t0566800-00	9.11314	9.97855	4.68826	9.17337	5.25315	9.44175	5
MSTRG.2047.1	6.53688	4.95684	4.89643	8.64095	7.75079	4.99169	7
Os01t0566900-01	1750.48	2486.78	1981.72	1597.8	1870.77	2270.36	3
Os01t0567400-00	5.37853	26.172	29.8924	4.92409	26.5446	45.9302	3
Os01t0567600-00	0	6.42947	56.8403	0	24.1347	155.099	6
MSTRG.2053.1	0	3.15528	1.92298	0	1.39071	1.07331	1
MSTRG.2054.1	0	3.75402	0	0	1.15759	2.05016	5
Os01t0570500-03	1.7099	1.12756	1.41592	1.69278	2.39909	2.40158	4
Os01t0570500-04	6.86901	9.46819	6.46131	21.0588	17.6938	23.4009	6
MSTRG.2056.1	1.22664	2.4064	1.53876	1.6657	1.05985	3.11435	6
Os01t0570800-01	7.95073	9.85777	24.2221	5.15695	3.69615	8.43443	1
Os01t0571000-01	23.0291	16.0874	15.8936	27.3124	29.6788	14.3727	9
Os01t0571000-02	91.0535	89.6859	78.8584	76.7562	96.0463	64.9537	5
Os01t0571133-01	0.44979	0.47169	0.987199	0.416551	1.7454	1.03041	4
Os01t0571200-01	213.949	182.365	148.107	231.65	157.584	171.65	2
Os01t0571300-01	6.74165	6.92181	4.80435	6.53548	4.53505	4.33133	8
MSTRG.2065.1	1.85074	3.93385	0.870429	3.14544	4.76816	1.58992	9
MSTRG.2066.8	13.9543	11.7069	7.58513	16.7261	8.55799	6.5444	2
MSTRG.2067.3	1.36822	0.32878	0.440824	1.50411	2.07088	0.597963	9
Os01t0571766-00	22.4415	20.3197	29.8017	28.2277	32.0264	39.8774	6
Os01t0571800-00	0	8.32909	4.85202	0	3.60555	6.49217	3
MSTRG.2074.1	3.95892	3.74809	4.02031	3.91928	4.10557	7.27123	6
MSTRG.2076.1	0	0	0.755841	0	0.345038	2.48062	6
Os01t0572966-00	0	0	0	0	0	2.21684	6
Os01t0574400-01	27.8112	13.4233	23.7283	48.0425	33.9545	14.1308	7
Os01t0574500-01	14.0482	8.98812	13.6271	26.8602	23.9454	6.22279	9
MSTRG.2082.1	3.91326	8.66659	6.2093	3.77699	6.22287	11.2997	3
Os01t0574800-01	125.876	149.295	160.918	74.2028	137.753	194.272	3
Os01t0575200-01	1.75448	6.37557	4.6082	0.81323	3.24938	3.9466	1
MSTRG.2087.1	4.33807	0	0	4.22866	0	0	8
MSTRG.2088.1	2.44351	5.65571	5.45666	5.2198	1.60793	3.55968	1
MSTRG.2089.1	2.15736	0.920764	1.66818	0.746117	2.55533	3.49159	6
MSTRG.2090.1	0.969104	0.769054	0.843029	1.50828	1.17343	0.677655	7
Os01t0578500-01	5.54511	1.86083	2.29499	5.54615	2.28579	3.23928	8
MSTRG.2096.1	0	0.912931	0.408016	0	1.66667	3.32076	6
Os01t0579000-01	522.087	1446.26	288.535	258.284	1298.59	191.255	5
MSTRG.2098.1	1.5483	1.5095	2.94169	0	0	2.38986	1
Os01t0579600-02	2.60611	3.30827	2.34924	2.76826	8.74347	9.63754	4
Os01t0579800-01	114.786	99.2395	84.3286	113.891	75.4358	85.6141	8
Os01t0579900-01	314.475	340.11	335.655	302.73	401.316	238.17	9
MSTRG.2102.1	5.97614	20.1556	9.2421	8.75395	11.7976	9.38548	5
Os01t0580100-02	0.786232	0.613224	0.37345	1.52907	2.21194	0.303395	9
MSTRG.2107.1	1.76737	6.44684	2.69217	1.74968	4.05625	2.50438	5
Os01t0580300-01	5.41309	6.41753	6.13999	8.87884	7.88309	10.8648	6
Os01t0580500-01	122.078	142.822	179.185	88.7056	95.0042	86.2038	1
Os01t0581300-01	16.3732	23.2793	37.7007	33.6246	46.1758	75.9631	6
Os01t0581400-01	1.12554	2.52387	1.69394	1.04236	1.78595	4.16955	6
Os01t0582600-01	83.379	117.466	143.95	47.3557	40.0248	59.1813	1
Os01t0583100-01	182.223	277.573	207.501	211.385	185.775	229.759	5
Os01t0583300-01	1.49791	3.73157	1.84088	3.68203	1.98629	4.80585	6
MSTRG.2122.1	0	3.46915	0	0	2.0712	3.66822	3
MSTRG.2123.1	0.476267	0.47244	1.25348	0.514735	2.28884	2.24821	4
MSTRG.2124.1	1.73468	5.47433	4.69754	1.71731	4.90397	17.1735	6
Os01t0584250-01	3.02394	4.47685	4.85373	1.9707	5.33138	5.388	3
MSTRG.2126.1	0.5114	0.426384	0.315891	0.491901	1.19273	0.096621	9
MSTRG.2127.1	10.2862	16.1376	2.48798	7.893	5.70218	3.91334	5
Os01t0584900-01	0	1.98546	0.276374	0	0	0	5
Os01t0585100-01	125.817	123.913	89.4128	132.339	133.313	77.307	7
Os01t0585300-01	10.7571	21.3413	32.0731	16.6662	45.7384	52.7984	4
Os01t0585400-01	5.19924	14.3109	14.6193	7.7647	13.831	14.4598	3
MSTRG.2136.4	3.93665	2.61085	1.45371	5.96668	7.22791	6.35393	9
MSTRG.2137.1	0	0.604094	0.554768	0.533478	1.14255	7.91786	6
MSTRG.2139.1	0	2.71765	4.15573	0	1.3954	6.29054	3
Os01t0586450-00	0	3.91212	5.84833	0	1.80951	13.1957	3
Os01t0586600-01	6.31771	5.37147	3.6506	8.75438	7.35472	6.18721	7
Os01t0587000-01	606.84	577.305	729.861	594.337	770.235	479.84	9
Os01t0587300-00	6.65536	9.54204	8.2004	5.43841	10.5065	11.1037	3
Os01t0587400-01	1.5237	2.15422	1.83853	1.3679	2.10686	3.07072	6
Os01t0587500-00	13.8208	31.9862	18.8279	6.17905	24.1043	18.0143	5
Os01t0587900-00	0.649084	1.36137	3.12553	0	0.557423	0	1
Os01t0588000-01	25.1199	65.4825	45.5663	17.6147	74.0963	40.0837	4
MSTRG.2151.2	4.01581	6.47142	3.87587	5.24395	11.0599	6.62616	4
Os01t0588600-00	0	2.23313	2.15454	0.29443	0.634882	5.55582	3
Os01t0588700-01	191.51	144.479	128.8	189.157	159.243	162.993	2
MSTRG.2156.1	1.3527	0	0	0	0	0	8
Os01t0588900-01	44.3028	50.6277	38.6368	34.5597	32.5354	40.3058	5
Os01t0588900-02	2.18405	0.722166	1.05551	0.666505	0	1.27268	8
Os01t0589100-01	88.3674	84.7159	85.4268	75.4424	98.9317	91.236	4
MSTRG.2163.1	4.27901	4.10179	3.19629	4.86943	3.2965	2.22435	2
Os01t0589500-01	0.543807	0	0	0.261536	1.1279	0.770579	4
Os01t0589700-01	255.786	285.15	245.671	269.721	314.88	268.956	4
MSTRG.2166.1	3.80491	2.81823	6.08046	3.26771	6.62681	7.48754	3
Os01t0589800-01	4.88353	6.10753	7.85677	6.21069	10.1289	14.3511	6
Os01t0590200-01	67.264	63.926	58.597	70.4967	54.9575	54.8297	2
Os01t0590100-00	1.571	1.7848	1.61734	2.14064	2.03649	2.22612	6
MSTRG.2171.1	2.81599	3.79684	2.71196	1.86278	2.07285	3.72564	3
Os01t0590900-01	9.51396	7.10468	4.09389	13.6606	11.7826	6.87391	7
MSTRG.2175.1	4.89965	2.96878	1.99025	3.77026	2.03246	2.42536	8
MSTRG.2176.2	0.906215	0.481553	0.355172	1.60434	0.293046	0.133472	2
MSTRG.2178.1	8.30975	15.9893	12.595	11.7873	22.7658	19.0977	4
Os01t0593500-00	112.477	67.6024	56.8331	91.3912	66.0779	56.0494	8
Os01t0594500-01	0	4.85713	29.957	0	46.5702	564.483	6
MSTRG.2184.2	0	0.478282	1.84579	0	2.91907	16.0404	6
Os01t0594900-01	0	0.22178	10.8941	0	7.76069	102.188	6
Os01t0595001-00	0	20.7297	104.245	0	46.1609	742.068	6
ENSRNA049471602-T1	10.7909	27.247	27.2269	6.78544	18.3976	47.1601	3
Os01t0595201-00	0	3.36487	11.9125	0	19.9647	10.8797	4
Os01t0595725-00	23.4594	14.6971	11.8774	20.4546	8.73588	18.5524	8
MSTRG.2194.1	17.3457	12.8007	8.3534	19.2989	10.5124	12.4177	2
Os01t0595900-01	4.34958	2.97987	2.01016	4.09577	2.32198	3.43364	8
MSTRG.2198.1	45.6735	72.9136	23.7468	34.0631	25.8	37.0846	5
MSTRG.2203.1	1.48397	1.31128	2.54625	1.34804	1.28246	6.19159	6
Os01t0597600-01	0.823642	5.71238	5.64948	0.754053	1.62597	4.62856	1
Os01t0598400-01	19.3782	15.2685	4.12611	13.6786	4.37567	4.38351	8
Os01t0598600-01	60.9714	34.9225	42.3642	107.383	60.6027	24.3846	7
Os01t0600000-01	599.947	592.323	570.359	627.258	826.56	671.901	4
MSTRG.2210.1	2.20757	0	1.13635	1.00268	0	2.08543	8
Os01t0600200-01	296.516	263.991	269.247	301.639	302.374	276.183	9
MSTRG.2212.3	3.11228	2.05819	0.401095	5.60368	3.58401	1.58575	7
MSTRG.2213.1	2.51187	0.905392	1.13599	1.9117	2.00256	2.51912	6
Os01t0600400-01	1.34352	1.39917	0.518683	0.915343	0.890197	1.11054	5
Os01t0600500-01	2.61595	3.42915	1.02527	2.82641	1.08095	1.51418	5
MSTRG.2217.1	0	0.826665	1.06343	0	0	0	1
MSTRG.2218.1	3.06821	3.05233	6.87144	2.28049	12.1489	7.04412	4
MSTRG.2219.1	14.0186	12.1842	7.93483	20.5577	10.4762	11.072	2
Os01t0601625-00	4.01893	3.33248	2.48606	4.67406	3.05007	3.63416	2
Os01t0601651-01	2.102	1.73405	1.09004	2.18235	0.801767	1.24789	8
MSTRG.2224.1	24.5362	25.4168	22.0781	25.9906	19.6737	17.9689	2
Os01t0601687-00	0	5.15747	0	9.51992	9.086	4.08268	9
Os01t0601700-01	2.79057	4.87741	5.40013	3.62693	4.43797	6.4816	3
MSTRG.2227.1	3.44254	4.954	6.37935	3.43992	3.79242	6.34153	3
MSTRG.2230.1	24.4442	18.4745	11.2509	22.1413	18.3831	11.5127	8
MSTRG.2233.1	5.879	5.88085	5.97818	2.54154	5.56137	6.42335	3
MSTRG.2234.1	1.5221	0.824685	0.935616	2.40464	2.6912	1.10772	9
Os01t0603000-01	442.955	278.006	260.997	425.483	294.453	228.483	8
Os01t0603100-01	0.428343	0.835218	0.7121	0.198344	0.311658	1.13559	3
Os01t0603500-00	25.6066	23.6338	20.7276	32.8203	24.9038	14.0145	7
MSTRG.2240.1	9.6171	6.55863	6.4787	13.512	11.2725	8.40605	7
Os01t0604150-00	20.4146	23.8836	20.7053	26.6327	21.1257	17.1254	7
MSTRG.2246.1	34.1068	41.1797	27.1489	44.0663	33.1341	32.888	7
MSTRG.2247.1	18.2224	25.6943	11.8561	23.3459	12.5	17.2142	5
Os01t0604500-01	25.851	36.5708	28.3546	13.6846	18.1713	26.4039	5
MSTRG.2251.1	0.156202	0.491421	0.300863	0.39821	1.36381	1.24233	4
Os01t0604700-02	0.121762	0.649602	1.41229	0.631666	1.68261	1.62542	4
Os01t0604900-01	74.4045	57.0257	63.1097	44.5881	47.344	64.2884	1
Os01t0605400-00	5.96994	3.17236	4.72607	4.45373	4.66542	12.2864	6
Os01t0605500-00	128.676	45.8932	16.9568	130.054	19.4182	14.739	8
Os01t0605650-01	1.42908	1.26025	1.33961	2.61189	1.98117	0.272078	7
Os01t0605700-01	0.59923	1.34352	7.83298	0.288191	6.98791	52.6451	6
Os01t0606000-00	4.09551	3.37458	4.40269	3.97746	7.53677	10.3854	6
MSTRG.2264.1	0	0	0	0	1.12173	0	4
Os01t0606200-00	0	0	0	0	0	4.2528	6
Os01t0607000-01	0.441237	0.437692	3.41186	0	13.5013	9.64184	4
Os01t0607100-00	12.7328	10.0969	3.96045	8.45135	6.59824	3.99936	8
MSTRG.2269.1	2.85948	6.07798	2.06539	2.42992	0.693508	2.52694	5
Os01t0607200-01	9.34001	12.6557	9.53001	13.7215	15.5111	13.3171	9
Os01t0607300-01	38.8697	22.2447	15.5002	25.6364	22.6265	22.6961	8
MSTRG.2273.1	7.44621	6.37295	5.13279	13.3708	7.49729	5.17381	7
MSTRG.2274.1	2.91194	2.06317	4.14941	1.23725	1.41247	0	1
Os01t0607800-01	3.95237	5.49494	3.31957	4.39365	6.40915	6.09211	4
Os01t0607800-02	0.291462	0.916959	0.56139	1.04903	1.13101	1.28784	4
Os01t0607900-01	348.702	455.115	418.217	195.925	250.342	489.728	3
MSTRG.2278.1	0.924858	3.6003	4.60272	0.799648	2.98629	7.40766	3
MSTRG.2279.1	1.4855	2.14177	1.4556	1.28439	2.99784	0	9
Os01t0609200-00	8.44655	5.47502	2.60703	7.67125	2.93645	2.16989	8
Os01t0609501-00	0	0.433401	0.422302	0	1.14529	0.392844	4
Os01t0609700-01	1.06042	1.3869	1.4556	1.39974	0.48675	2.10996	6
MSTRG.2284.1	3.39613	2.93968	5.49419	2.88182	1.33618	2.45048	1
MSTRG.2286.1	0	2.99514	2.34258	0	1.51265	1.21053	1
MSTRG.2289.1	0.305158	0	0.920526	0.277206	0.316462	1.1531	6
MSTRG.2290.2	8.07288	9.91135	6.44728	12.2247	12.3019	9.81075	9
Os01t0610600-02	3.80887	3.78916	2.2856	8.49299	3.01984	3.43458	7
Os01t0610700-01	54.0221	58.5116	60.2424	44.2771	80.357	96.0504	6
Os01t0611100-01	12.8279	11.6116	11.2737	15.9501	11.6808	10.0564	2
MSTRG.2297.1	0.340377	5.14364	3.2335	0.433868	2.86925	5.70197	3
MSTRG.2299.1	0.353685	0.552915	0.237091	1.12451	0.550181	0.167058	7
Os01t0612200-01	294.752	320.038	303.623	216.641	213.902	254.455	5
Os01t0612600-01	6.5099	7.91853	3.95492	17.0528	11.0355	10.1215	7
MSTRG.2308.1	1.81798	1.47439	0.933509	1.50835	1.43313	1.32813	8
Os01t0612900-01	7.96992	10.2385	14.4312	13.4462	16.203	22.0096	6
MSTRG.2312.2	0.824186	1.78245	1.3941	1.88638	1.66327	2.83145	6
Os01t0613300-01	151.84	167.024	133.566	167.055	165.934	118.907	7
Os01t0613400-01	1.12897	2.35322	3.48681	6.706	4.78743	4.14709	7
Os01t0613500-01	0	0	0.215067	0	2.02066	9.95919	6
Os01t0614300-01	5.8895	39.4839	28.9734	2.08189	60.3325	23.1292	4
MSTRG.2321.2	10.0321	13.5627	7.16265	15.7831	15.9425	10.254	9
Os01t0614750-00	0.729292	0.657175	0.523478	0.500755	0.899818	1.31147	6
Os01t0615050-00	0	0	10.8191	0	0	0	1
Os01t0615500-00	8.60448	5.76062	4.56607	5.10559	8.34175	5.96173	9
MSTRG.2329.1	9.6994	8.36582	8.15158	16.7864	13.4333	4.30008	7
Os01t0616366-00	2.06083	2.1478	2.73673	1.37233	0.873187	1.31022	1
MSTRG.2332.4	5.90384	7.42509	6.30155	9.55531	14.4675	14.5032	4
Os01t0616600-01	64.9844	44.1999	32.0267	33.0134	23.1565	37.5642	8
MSTRG.2335.1	2.24659	3.35477	2.918	3.67281	4.3467	5.18973	6
MSTRG.2337.1	0	3.0085	0.998519	1.91035	0	0	5
Os01t0616800-01	10.4275	8.97871	9.70242	7.69018	4.04947	9.87389	5
Os01t0616900-00	0.472236	0.369123	0.35967	2.33754	1.12643	0.54209	7
Os01t0617500-01	110.857	60.1178	69.4129	156.806	111.913	55.6813	7
Os01t0617600-00	38.3701	27.9257	22.0687	31.8244	22.8644	33.7927	8
Os01t0617800-01	45.3645	33.977	25.0912	41.913	35.0055	32.8465	8
Os01t0618000-01	3.91854	18.443	13.6905	1.55527	11.3807	17.0669	3
Os01t0618100-01	271.695	213.694	290.828	240.703	228.556	180.254	1
Os01t0618300-01	0.60889	1.17052	1.94247	0.929074	1.10185	2.92718	3
Os01t0618400-01	20.9582	18.0141	22.7582	21.7738	36.2022	35.9334	4
ENSRNA049471535-T1	2.47432	2.7738	3.73197	1.18999	2.56598	4.08268	3
MSTRG.2362.1	0.343509	0.334901	0.646228	0.309088	0.333244	2.42849	6
Os01t0619900-01	0.247387	0.736197	2.13086	0.932422	8.3023	8.64937	4
Os01t0620100-01	207.639	153.618	134.117	231.141	150.261	106.493	2
MSTRG.2364.1	3.84536	8.58254	4.18137	2.64035	2.94	5.04169	5
Os01t0620301-00	0.846552	3.20393	4.9771	0	2.29789	8.37286	3
Os01t0620800-01	8.77438	8.00157	10.3425	10.1056	2.11236	2.06827	2
Os01t0621300-01	321.333	400.209	361.489	299.281	424.114	339.14	4
Os01t0621500-00	0.766671	2.412	10.1964	0.689849	13.3877	7.90352	4
Os01t0621600-01	16.9668	33.8173	23.7948	12.1679	46.9794	53.2017	4
Os01t0621700-01	146.952	166.244	165.609	102.638	150.597	132.268	1
MSTRG.2375.2	5.13604	4.73111	3.80605	7.76436	8.0283	4.18003	9
MSTRG.2379.1	1.55284	0.639674	1.2329	3.26063	3.05289	0.847706	9
Os01t0622600-01	402.649	268.411	312.635	329.895	279.183	166.008	8
Os01t0622700-01	10.1892	12.5315	10.6692	6.23144	12.774	5.193	5
Os01t0623000-00	13.2518	2.70897	1.23506	12.3509	0.734222	0.755531	8
MSTRG.2384.1	0.618712	0.7922	0.956838	1.39087	1.49833	1.11262	9
MSTRG.2393.1	429.444	438.088	320.072	810.512	430.622	175.977	7
MSTRG.2395.1	5.90296	1.32348	2.99725	3.21735	2.70954	3.409	8
Os01t0625900-01	15.8432	15.0518	17.0389	11.7747	17.3373	20.0895	3
MSTRG.2397.1	188.726	151.872	160.089	226.604	183.083	108.243	2
Os01t0626100-01	3.67689	2.84671	1.84921	6.30958	6.60948	3.99484	9
Os01t0626300-01	0	0.534453	0	0.507679	1.06362	0	9
Os01t0627500-01	0.1641	1.30225	0.793065	0.309254	0.647907	2.29497	3
MSTRG.2407.1	1.13027	4.07401	4.36991	3.10432	7.80951	5.32524	4
Os01t0628700-01	0	0.219829	2.24103	0.131829	0.615393	0.399811	1
MSTRG.2411.2	1.03812	0	0	1.46729	0	0	2
Os01t0629400-01	1.00395	1.33068	1.2744	1.61509	2.53456	2.13391	4
MSTRG.2412.4	2.4243	4.45163	1.87573	4.57148	3.42677	4.36222	7
Os01t0629900-01	11.4407	9.64612	10.31	26.499	23.3838	12.1914	9
MSTRG.2415.1	0	5.75512	2.1356	0.385867	0.881024	5.25667	3
Os01t0630300-01	88.709	132.796	89.0525	53.4965	97.3496	15.4036	5
MSTRG.2419.1	1.76031	1.7162	1.88418	2.06327	4.63522	3.7549	4
Os01t0631100-02	1.22835	2.44803	2.63339	2.09431	8.35079	3.50944	4
MSTRG.2420.1	5.11401	6.08751	2.00444	2.89127	6.0574	3.57602	5
Os01t0631400-01	78.5192	106.482	79.3134	59.4524	80.4055	24.4102	5
MSTRG.2423.1	12.1263	8.34357	10.2992	11.5503	13.9788	4.75715	9
MSTRG.2424.1	0	0.937722	0.516982	0	1.19968	0.944316	4
MSTRG.2428.1	2.50731	2.29883	0.950995	3.04637	3.1476	2.06018	9
MSTRG.2429.1	0.788838	1.80868	0.801072	2.43638	1.88286	0.724419	7
MSTRG.2429.4	1.44135	1.27362	1.73118	8.0859	2.98949	1.7837	7
Os01t0632700-02	8.36082	7.01532	5.24705	12.0877	7.88317	9.34462	7
MSTRG.2430.1	1.36523	1.47627	2.63916	4.7216	2.02134	4.29636	7
MSTRG.2431.1	3.50314	3.15673	2.3702	3.4832	3.21402	3.9887	6
Os01t0633000-01	124.33	144.011	203.512	131.344	281.16	320.79	4
MSTRG.2433.8	3.03079	1.71668	0.919223	6.93679	1.63939	0.756895	2
Os01t0633200-01	261.031	184.935	171.499	378.249	224.427	93.4338	2
MSTRG.2435.1	6.81453	3.31798	2.50555	4.81879	4.54305	3.21875	8
MSTRG.2437.1	0	6.34011	0	8.15993	1.298	1.33567	7
Os01t0633800-01	0.43896	0.702557	0.424283	1.51813	0.319629	0.402141	7
MSTRG.2439.1	39.5851	55.7794	41.3969	41.9483	47.7796	61.3579	3
MSTRG.2442.1	1.19324	3.75402	2.26709	1.07367	0	2.76272	5
Os01t0635200-01	17.9778	47.876	54.2301	11.1562	47.5107	111.21	3
Os01t0636100-01	10.4385	5.70998	3.53348	8.92492	12.7772	7.45586	9
MSTRG.2448.1	0.759014	0	0	4.92192	0	0	7
Os01t0636400-01	49.4275	34.162	54.5504	46.9438	97.5465	46.8329	4
MSTRG.2451.1	0.57973	0	0	1.82574	1.24466	0	7
MSTRG.2454.1	25.0435	22.0742	16.004	57.4554	31.8619	12.3725	7
MSTRG.2456.1	0.838753	0.889377	0.170352	1.29084	0.308	0.316939	2
Os01t0637500-00	0.261667	0.370792	0	0.444718	0.898862	1.61866	6
Os01t0637600-01	50.2604	62.9588	59.3103	58.6544	52.057	58.6165	1
Os01t0637800-00	1.86353	4.37445	3.28685	1.93349	1.95398	6.36718	3
MSTRG.2460.1	10.8076	9.9822	5.94401	7.90178	4.51288	11.853	5
MSTRG.2461.1	0	0	0	5.38366	1.25658	0.559862	7
Os01t0639200-01	4.59791	59.6033	95.1329	4.76279	81.6101	274.644	6
Os01t0639600-01	0.965804	2.83391	14.9361	1.59259	2.85992	11.5062	1
MSTRG.2465.2	0.968427	2.59644	4.78238	0.871388	3.05334	3.95176	3
MSTRG.2466.2	10.6841	14.2543	10.0328	22.1278	18.0561	24.4511	6
Os01t0640200-00	0	0.334817	1.18534	0.267713	0	1.25281	3
Os01t0641000-01	60.5474	70.3896	74.2069	69.9929	84.6205	102.218	6
Os01t0641050-00	1.54377	1.94875	3.13543	0.509439	3.27321	1.94448	1
Os01t0641100-01	68.3484	76.3171	55.8204	59.1991	60.8203	63.3628	5
MSTRG.2474.1	0	16.4484	8.79646	0	12.7465	21.7352	3
MSTRG.2475.1	0	13.9605	7.83787	0	10.2999	9.19944	3
MSTRG.2476.1	0	6.94107	5.50508	0	8.26783	12.7617	3
MSTRG.2478.1	3.03494	1.58151	2.56834	0.973075	3.21745	3.34486	4
Os01t0642000-01	0.391455	1.22392	0.795052	0.188265	1.01489	1.61477	3
Os01t0642200-01	972.644	2571.53	2512.97	668.473	4135.38	6627.46	6
Os01t0642600-00	16.0646	11.3282	4.50035	16.4522	7.18092	3.13982	2
Os01t0642700-00	0.731341	0.863615	1.60515	0.677295	0.709488	1.6754	3
Os01t0642900-01	5.5502	6.18421	4.2418	7.49108	4.03827	5.06602	2
Os01t0642801-00	1.22335	1.30532	1.17081	0	4.27576	3.84253	4
MSTRG.2488.1	6.80147	10.3027	15.6387	16.0548	3.894	1.74972	2
MSTRG.2489.2	6.14038	9.25487	6.51092	7.21027	5.42522	4.22003	5
Os01t0643600-00	9.06863	5.45177	2.8434	13.1053	2.39936	2.12471	2
MSTRG.2497.1	6.8454	4.17374	4.67958	1.84292	2.89578	1.75856	5
MSTRG.2498.1	2.77704	23.356	8.16348	3.48897	6.39592	13.8109	5
Os01t0644600-00	66.7666	327.131	583.359	33.5928	228.084	576.665	3
Os01t0645200-01	0.730003	0.482759	0.235198	1.26235	1.70097	1.91423	4
MSTRG.2505.1	1.19324	1.16334	0	1.01399	1.18336	2.10895	6
Os01t0645900-01	2.84303	2.78874	5.00275	1.23137	2.93623	9.79071	6
MSTRG.2507.2	2.08482	2.17691	1.57522	2.81278	2.38276	2.0141	7
Os01t0646300-01	60.4924	63.8837	62.0108	46.1873	38.3979	55.5626	5
Os01t0646800-01	0.692724	0.631711	0.713157	1.16604	1.34697	0.654397	9
Os01t0647000-01	4.59884	39.2306	48.5253	7.40282	42.7453	34.4583	1
MSTRG.2512.1	1.07905	0.953481	1.09578	1.30695	1.33459	0.890228	9
Os01t0647200-01	11.7143	4.84156	3.04703	13.8653	1.43715	0.985908	2
Os01t0647700-01	42.7535	23.0767	29.3702	49.8464	23.329	8.45363	2
MSTRG.2515.2	1.01337	0.649158	0.298076	1.44658	0.900783	0.23887	7
Os01t0647850-01	3.62454	3.48717	2.42041	6.88557	5.29642	2.34374	7
Os01t0648700-01	17.1195	19.1363	14.9711	17.4145	25.7492	27.9529	4
MSTRG.2525.1	3.7472	7.42865	2.29487	5.1459	10.232	9.26546	4
MSTRG.2526.1	6.0673	8.92717	11.1675	6.20049	11.0111	12.514	3
Os01t0649732-00	0.820217	1.24246	0	0.788943	0	0.676688	5
Os01t0650000-01	0.524734	0.378276	0.599871	1.1537	1.20854	0.917313	9
MSTRG.2530.2	1.84655	2.762	3.50835	4.0615	4.58117	5.6207	6
MSTRG.2536.1	0.723793	1.54458	1.38542	0	5.71541	1.2653	4
Os01t0651150-00	27.8423	43.8191	46.0976	12.1679	32.45	42.0283	1
Os01t0651200-01	4.15271	7.57719	6.21848	2.74351	11.7451	8.87653	4
Os01t0651300-01	1.55977	1.5742	1.22271	1.34861	1.09032	2.99938	6
Os01t0651400-01	0.669624	0.979267	0.629868	0.569032	0.996119	1.80878	6
Os01t0651800-01	4.15676	5.27967	4.40041	9.42327	6.59107	3.80633	7
MSTRG.2545.1	3.73483	7.78486	11.1505	3.69744	6.73101	6.7788	1
MSTRG.2546.1	0	0.996575	2.70829	0	0	0.839793	1
MSTRG.2547.1	11.3092	22.0516	14.1361	13.5303	20.9321	16.8742	4
Os01t0651932-00	0.20076	1.42242	0.762868	0.361287	1.39368	0.619762	4
Os01t0652000-01	12.5041	23.996	16.1958	10.0111	16.8508	14.3375	5
Os01t0652100-01	8.12014	29.5711	22.0074	5.07376	30.9089	56.8322	3
MSTRG.2549.1	1.80622	4.6536	4.55636	1.53489	9.87631	8.55399	4
Os01t0652300-01	0.897884	1.75077	2.53372	1.21187	0.890449	2.77714	3
Os01t0652375-00	3.6513	10.6794	16.3521	4.21093	10.3459	23.0477	3
MSTRG.2552.1	0	3.09121	4.14465	0	4.23255	11.5666	6
Os01t0652450-00	4.41237	20.5715	23.6481	4.98918	19.2772	85.6945	6
Os01t0652800-01	302.452	337.005	356.944	234.863	235.764	183.243	1
Os01t0653350-00	0	0	1.31097	0	0	0.406508	1
MSTRG.2561.1	0	0.637973	0.846971	0	2.18381	6.18828	6
Os01t0653500-00	6.01358	3.47561	2.17969	4.12912	6.06792	12.7028	6
Os01t0653601-01	0	0	1.93037	0.690707	2.82127	3.1365	4
Os01t0653800-02	19.3927	29.9752	17.8528	20.3548	20.5698	30.9854	6
MSTRG.2566.1	11.3328	10.3001	11.3953	8.97545	9.61141	6.42345	5
Os01t0654100-01	33.6972	9.64188	18.2865	48.6798	21.2077	5.67833	2
Os01t0654100-02	7.42943	2.92439	1.59	10.7029	5.32127	2.48205	2
Os01t0654150-00	0.766473	0.950394	0.185211	2.70835	0.945693	0.167489	7
Os01t0654450-00	0	1.40553	3.73197	0.594995	0.655778	0	1
Os01t0654500-01	309.07	396.263	296.337	242.365	324.855	370.354	3
MSTRG.2575.1	0	0.289428	1.92122	0	1.62046	5.41488	6
MSTRG.2576.1	10.5645	4.63593	1.14486	6.95275	2.94732	3.66983	8
MSTRG.2578.1	0	0.711662	4.09414	0	2.58778	6.80516	3
MSTRG.2579.1	62.8407	42.7537	30.1939	75.6207	53.2808	43.8502	2
Os01t0655500-01	5.62334	6.15011	6.72729	5.10513	5.5323	6.1938	1
MSTRG.2583.1	0	0	0.648996	0	0.289363	11.0172	6
Os01t0656300-00	0	0	1.86017	0	0	3.39777	6
Os01t0656400-00	1.53892	3.00071	9.04719	0.692358	1.1197	1.65255	1
MSTRG.2590.1	19.7314	15.0062	21.662	30.0929	28.5735	6.96506	9
Os01t0656900-01	56.9893	54.0193	37.8341	67.144	59.7125	53.9169	7
Os01t0657801-00	8.91152	8.87307	7.56511	9.98967	3.19663	2.68092	2
MSTRG.2596.1	8.02483	5.74751	10.8657	5.36031	12.4832	6.25276	4
Os01t0658500-01	0.323604	0	0.309707	0	0.326529	1.41427	6
Os01t0658600-00	1.4139	0.396257	0	0.699872	0.366569	0	8
Os01t0658700-01	1.69915	1.32526	1.63639	3.46189	2.96709	2.09817	9
Os01t0658900-01	50.0743	53.4293	31.305	72.8682	48.0819	25.2375	7
Os01t0659200-01	978.539	1064.96	1247.8	762.504	1210.85	1051.84	1
Os01t0659800-01	33.5514	35.3998	17.8349	19.7556	14.092	25.3741	5
Os01t0659900-01	21.8013	29.6945	29.6955	24.4955	24.4824	26.2282	1
Os01t0660200-01	0	0	4.14717	0	0.249124	0.661824	1
Os01t0660700-01	4.96615	4.5895	5.0775	2.59952	3.56095	5.00825	1
Os01t0660800-01	150.264	85.0369	39.316	91.3975	33.3552	27.6227	8
Os01t0660900-00	7.17496	6.52168	9.85239	3.99836	5.2346	15.9225	6
MSTRG.2616.1	7.31328	4.08161	3.11633	9.18813	4.76088	5.44436	2
Os01t0661601-01	5.50335	29.9715	49.8035	7.14178	21.1982	78.2155	3
Os01t0661650-00	2.21615	2.16062	2.3392	4.20974	2.442	3.61075	7
Os01t0661700-01	8.1755	8.59579	9.13708	8.17337	10.1084	11.4746	6
MSTRG.2619.1	0	1.66582	0.754758	0	3.10887	1.38514	4
MSTRG.2620.1	7.31552	9.07093	14.1418	5.74065	5.00896	23.2568	6
Os01t0662300-01	6.94916	24.3608	16.2594	8.03425	13.758	28.4274	3
Os01t0662600-04	1.36157	2.07149	1.8765	2.6193	2.72315	2.20497	9
Os01t0662700-01	68.2934	94.2718	76.4747	55.4028	143.232	83.3269	4
Os01t0662800-00	49.2594	21.5615	17.0904	29.6775	9.14196	6.61163	8
MSTRG.2624.1	2.13021	4.02479	3.37275	2.63039	4.82198	2.74006	4
Os01t0663051-00	4.80912	30.3564	73.6112	2.60062	107.96	265.423	6
Os01t0663500-01	23.1092	18.9756	14.2228	27.6719	13.7982	11.8972	2
MSTRG.2628.2	1.37123	1.82888	0.994034	0.94153	2.70697	2.42269	4
MSTRG.2629.1	0.282805	0.59315	0.53203	1.04139	0.161913	0.21826	7
Os01t0664500-02	1.00361	1.49332	0.485024	1.89134	3.65389	1.95516	9
Os01t0665200-02	2.765	3.91613	2.66389	2.59695	5.33642	4.28639	4
Os01t0665300-01	1.679	1.28937	1.77713	1.84631	2.83937	2.26006	4
Os01t0665400-01	93.3157	75.8211	76.245	96.5285	71.2177	65.272	2
MSTRG.2638.1	0.702994	2.98851	4.84174	0.597389	3.13728	22.3647	6
Os01t0665900-00	0.506223	9.55568	7.21348	2.27749	3.01219	5.21859	1
Os01t0666200-01	91.2586	68.1394	59.1633	91.9246	54.8465	55.8621	8
MSTRG.2641.1	0.787598	2.44137	4.25981	0.418302	2.00567	5.31863	3
Os01t0666500-01	1.781	2.11974	1.27917	1.46837	1.31927	1.20176	5
Os01t0666600-00	6.18092	4.45577	3.86569	5.32583	7.17757	5.13904	9
MSTRG.2643.1	19.1916	16.4455	5.89144	14.5584	26.8065	4.58936	9
MSTRG.2645.1	5.96725	2.6308	3.57327	4.99802	5.23558	2.34288	8
Os01t0666950-00	1.00307	1.07028	0.491442	0.867271	0	0.438378	5
Os01t0667000-00	0.561814	6.14798	10.7001	0	2.91313	6.96511	1
Os01t0667100-01	43.38	44.3589	53.8754	38.8833	35.2497	49.5277	1
Os01t0667200-01	1.26383	1.57326	2.06399	4.04966	4.36615	1.84113	9
MSTRG.2651.1	183.256	136.685	150.617	221.448	225.76	80.189	9
Os01t0667400-02	1.54712	0.403102	0.796379	1.02109	1.47073	2.23369	6
Os01t0667600-01	2.55439	3.68287	4.2782	2.48464	1.57583	2.7909	1
MSTRG.2654.1	1.61775	3.7853	3.07363	0.824835	3.85044	3.14516	3
Os01t0667725-00	1.22472	2.01804	0.669786	0.989163	1.83453	2.141	4
Os01t0667800-01	0.343358	0.585131	0.258939	0.33992	1.09202	0.354092	4
Os01t0667900-01	13.0083	120.387	95.7708	11.4446	26.8111	58.3398	1
MSTRG.2660.2	1.67184	1.13962	0.672426	2.57295	2.77403	1.89521	9
Os01t0668100-01	34.1817	98.3873	82.0492	14.132	105.631	138.433	3
Os01t0668400-00	4.61017	6.35157	6.18891	8.67579	11.1235	10.1564	4
Os01t0668500-01	0.410392	1.86498	1.04189	0.609425	0.753503	0.169289	5
MSTRG.2666.1	8.43593	6.68244	7.10877	10.4371	6.33907	3.66221	2
Os01t0668600-00	4.26309	7.87901	8.1846	3.65009	12.7851	17.0353	3
Os01t0668901-00	18.2343	14.9213	12.3849	20.0775	14.2966	17.3922	2
MSTRG.2672.1	9.85861	1.01528	0	6.08851	0	0	8
MSTRG.2673.1	4.10081	5.66595	4.87935	5.95159	4.60698	5.39912	7
MSTRG.2674.1	5.73145	6.76834	4.4846	7.496	4.2926	8.09816	6
MSTRG.2675.5	0.203493	0.880177	0.779014	0.52783	1.77808	3.37949	6
MSTRG.2676.1	3.79679	2.54005	1.12477	4.40961	2.00597	2.35739	2
Os01t0672400-02	3.85609	9.5356	7.02557	2.91925	7.21406	7.28548	3
Os01t0672500-01	166.241	173.001	115.526	142.554	129.019	135.451	5
MSTRG.2680.4	3.14259	1.1989	0.771134	2.21298	1.64275	1.0545	8
Os01t0673300-01	30.3115	35.9517	22.4981	25.4299	16.5803	19.2396	5
Os01t0673600-01	544.573	326.447	500.286	612.315	687.867	402.282	9
Os01t0673650-00	0.648294	1.47305	0.667417	0.588911	0.595153	2.1394	6
Os01t0673700-00	1.19967	2.81317	2.11101	1.48458	0.826	1.23718	5
MSTRG.2688.2	60.9697	51.5341	39.0369	74.9931	60.0866	52.6479	7
Os01t0674000-01	83.1026	78.0214	70.0696	80.9748	67.3503	91.4204	6
MSTRG.2694.1	5.23693	8.76271	5.12593	7.08273	8.34115	6.35534	9
Os01t0674500-03	5.82833	7.98399	6.97474	5.99914	4.65712	4.99094	5
Os01t0675100-01	1792.73	1564.52	1523.03	2189.09	2053.8	1233.8	7
MSTRG.2707.1	8.79698	7.94233	9.71444	8.28915	8.68315	15.4097	6
Os01t0677900-01	0.405795	0.950735	1.3917	0.382369	1.4183	2.38986	3
MSTRG.2709.1	14.8833	19.0566	11.9587	10.0373	15.6185	19.1668	3
MSTRG.2710.8	1.76935	1.92639	1.23529	4.65278	3.03904	0.964759	7
Os01t0678600-01	27.3945	25.9198	46.8646	48.2788	64.9285	55.6716	4
Os01t0678600-02	5.8869	3.34797	2.7962	8.75447	10.9538	6.74303	9
Os01t0678700-01	82.2593	72.4694	53.21	95.8855	67.2011	52.607	2
MSTRG.2717.1	2.14894	1.06584	0.877374	2.69985	1.06057	0.313055	2
Os01t0679500-01	18.4496	9.55365	6.71474	18.2416	11.1574	7.54982	2
Os01t0679550-00	2.95225	1.65531	0.627881	2.16364	1.61892	0.589886	8
Os01t0679700-02	1129.48	725.319	675.22	1295.04	916.11	409.571	2
Os01t0679900-02	1.01724	1.9296	1.88279	2.17302	2.56598	2.33742	4
Os01t0679900-03	1.25002	2.95222	3.06768	3.28057	8.89293	6.9801	4
Os01t0680650-00	2.01985	0	0	1.94284	0	0.927453	8
Os01t0680700-02	3.54493	6.29568	4.42489	3.64492	5.31318	6.92855	3
Os01t0680950-01	13.8223	8.03762	14.5118	9.27231	12.4941	6.24915	1
MSTRG.2732.2	2.11249	2.05956	1.98707	4.03909	2.61875	0.907392	7
MSTRG.2736.4	5.19924	4.15463	1.79687	5.74406	4.03822	2.72699	2
MSTRG.2741.1	74.1613	65.8737	67.6228	95.1741	83.0891	39.5475	7
Os01t0683100-01	69.1535	47.0766	53.7901	81.8015	71.5626	21.484	7
MSTRG.2746.1	149.539	152.419	140.661	138.377	154.246	55.6006	5
MSTRG.2749.2	1.76451	1.83897	1.48627	1.53002	4.49151	1.52191	4
MSTRG.2750.1	1.16837	0.772655	1.88217	0.673461	0.785951	3.06372	6
Os01t0683600-01	22.7851	19.3067	12.7262	30.593	23.0385	15.2733	7
MSTRG.2753.6	1.13544	1.11376	0.998996	3.99682	1.65512	0.351283	7
MSTRG.2754.2	3.23762	2.53969	1.44765	5.01121	2.80435	2.48335	7
MSTRG.2754.4	0.482155	0.171487	0	0.6948	1.11047	0.252407	9
MSTRG.2754.8	0.539092	0.575212	0.868443	1.08759	1.09911	0.84664	9
Os01t0684301-01	4.48587	5.7836	5.81373	5.98916	7.544	11.5961	6
Os01t0684400-01	3.95014	0.498637	0.677776	7.16942	2.73098	0.621931	2
Os01t0684900-01	2.70468	2.16899	2.39444	4.43786	4.89122	7.65393	6
Os01t0685200-01	13.1849	16.0379	14.0184	18.3478	11.1923	16.1513	7
MSTRG.2761.1	18.2917	18.8466	35.5844	13.0922	38.3418	24.063	4
Os01t0685500-01	5.16825	5.05077	2.0316	6.05775	2.44878	2.36236	2
Os01t0685600-01	25.8464	21.9077	13.3115	23.0913	29.4056	31.2052	4
Os01t0685800-01	4.34727	2.8536	3.20559	5.01782	3.4588	1.91282	2
Os01t0686000-01	5.98872	31.682	50.3229	2.5882	33.2591	167.942	6
Os01t0686200-01	0	4.29717	8.36721	0	4.41084	15.7218	3
Os01t0686300-01	5.39889	23.1088	47.4721	2.06668	16.6835	68.4161	3
MSTRG.2773.1	88.3867	48.617	46.7079	71.1992	61.6881	33.5487	8
Os01t0686650-00	0	4.54261	3.85149	0.261518	1.91764	1.21295	1
MSTRG.2777.2	1.55372	0.649192	0.626344	0.822227	2.85923	0.588442	9
MSTRG.2780.1	1.30887	4.11781	2.46233	6.47747	1.90465	2.31333	7
MSTRG.2781.4	0.478901	0.155451	0.550336	0.870068	1.34803	0.790197	9
Os01t0687400-01	2.14099	4.20981	9.56591	2.72905	2.65408	3.51125	1
MSTRG.2784.4	2.1312	3.55312	1.80245	3.45501	3.37524	2.51508	9
MSTRG.2785.1	1.03896	1.45273	0.986984	2.96037	1.34389	0.918137	7
MSTRG.2786.1	0.870091	1.31801	0.441793	0.646035	0.599077	0.616463	5
MSTRG.2786.2	3.85327	3.59752	3.93305	5.69149	4.69811	5.05207	7
Os01t0687800-00	11.1797	16.2189	13.5405	8.95185	15.3447	14.1063	3
MSTRG.2791.1	1.59498	1.69512	1.50029	2.03307	1.54733	1.4095	7
Os01t0688300-00	1.46844	0	0	1.16299	1.55674	2.69705	6
Os01t0688700-01	0	0.838613	0	0	0	1.3277	6
Os01t0689000-01	30.7497	48.0699	36.8559	23.4251	22.4497	32.675	5
Os01t0689600-01	46.5829	40.6546	38.9894	46.7884	44.1552	49.992	6
MSTRG.2799.1	5.70619	5.63938	3.39688	9.6524	7.40608	4.60777	7
Os01t0689900-04	3.11983	11.5372	8.73529	7.46129	9.63736	16.3631	3
Os01t0689900-01	0	0	0.280072	0	0.295285	1.0525	6
Os01t0690800-01	1.04333	1.75496	2.24098	0.983097	2.63178	2.43185	4
MSTRG.2805.1	4.92096	3.59824	8.76522	3.3209	9.76042	7.39806	4
Os01t0690900-00	0	0	0.754758	0	0	1.34652	6
Os01t0691200-01	3.55479	12.0449	7.14882	1.97957	4.80922	10.0331	3
Os01t0691600-01	3.38242	2.34028	2.38399	3.52334	2.15515	4.54723	6
Os01t0691700-01	267.019	218.345	190.826	282.229	241.913	145.488	2
MSTRG.2817.1	3.01567	7.86556	3.52753	3.47305	3.04292	6.44336	5
Os01t0692700-01	8.6115	7.89433	6.38439	7.86512	19.6063	16.2863	4
MSTRG.2825.1	25.1705	19.3339	18.934	31.8403	42.0027	23.543	9
Os01t0693400-01	31.3769	67.0923	115.252	18.2574	16.2696	34.5063	1
Os01t0693800-01	5.1543	2.12937	4.24042	3.09254	3.01114	4.44651	8
MSTRG.2831.1	1.1442	1.29992	0	1.03939	1.0504	0.540445	5
MSTRG.2831.2	3.8218	2.7551	1.847	5.68571	5.30246	2.92297	9
Os01t0694100-01	1.90756	0.881442	0.945462	1.71642	1.21083	1.68573	8
MSTRG.2835.1	97.9861	63.5922	61.778	154.003	87.4256	62.472	7
Os01t0694500-01	0.451781	1.62842	4.10759	0.4257	6.83795	76.9776	6
MSTRG.2837.1	3.05194	3.20054	1.44963	1.37306	1.48037	0	5
Os01t0694800-01	12.0812	16.6688	13.0823	9.6602	4.81874	11.0946	5
MSTRG.2844.2	0	0.735032	0	0	0.731396	1.99875	6
Os01t0695800-01	5.00988	7.11391	5.76592	11.244	4.60299	5.23539	7
MSTRG.2847.1	3.56817	2.86526	3.3859	6.1107	4.67094	2.59714	7
MSTRG.2854.1	7.42297	5.21887	5.80528	10.2065	6.76041	6.34444	7
Os01t0697100-01	40.2962	83.5517	146.423	18.6069	88.8057	108.12	1
Os01t0697400-00	31.1712	42.6435	32.1911	13.5989	8.21845	10.674	5
Os01t0697700-00	25.1931	47.743	9.04719	9.80804	20.5278	7.71192	5
MSTRG.2858.1	1.97682	4.12048	0.802992	1.4366	1.25742	0.74698	5
MSTRG.2859.1	22.7055	41.1175	8.7811	9.97288	12.9377	10.5402	5
ENSRNA049471527-T1	9.90332	14.7356	0	37.3265	24.982	13.3567	7
Os01t0698200-00	0	14.7024	9.85147	0	10.2908	17.0464	3
Os01t0698300-01	13.1481	8.69839	9.42691	21.7065	11.7381	7.03465	7
Os01t0698500-01	36.4066	21.3272	18.8862	32.7122	28.6926	14.7627	8
Os01t0699100-01	2.50037	17.5897	17.774	3.713	3.5343	6.12314	1
Os01t0699400-01	0.46011	23.9617	30.2413	2.188	9.28536	23.9291	1
MSTRG.2871.1	0	11.3313	9.10527	0	1.31029	17.4046	3
Os01t0699600-01	1.18524	20.2223	34.1391	2.45946	1.24277	1.06569	1
Os01t0699900-01	37.6353	53.4386	27.5263	35.3625	86.2687	24.034	9
MSTRG.2876.2	0.684111	0.729947	0.440824	1.46139	0.996272	0.895325	7
Os01t0700300-00	0	1.69939	1.02662	0.226466	1.29269	1.41305	3
MSTRG.2879.1	1.70189	3.5695	0.800422	6.89109	4.38466	2.25596	7
MSTRG.2883.1	0.23731	0.578408	1.69079	0	1.76509	1.12127	4
MSTRG.2884.4	0.84126	0.88212	0.295684	1.89045	0.694524	0.600542	7
MSTRG.2885.1	0.626415	0.451577	1.08984	0.344093	0.126415	0.788528	1
Os01t0702700-01	65.6621	158.891	271.721	35.8321	262.127	479.236	3
Os01t0703300-01	13.568	318.122	281.686	1.80125	221.606	356.364	3
Os01t0703300-02	1.02245	12.1478	8.42085	0.185758	11.2636	15.0232	3
Os01t0703400-01	55.7396	33.6862	47.5039	119.213	96.1665	25.3838	7
MSTRG.2891.1	0.682572	2.29556	2.07947	2.02721	0.62662	2.57923	3
Os01t0704100-01	0.624846	0.563058	1.04652	0.735969	2.83722	0.955783	4
MSTRG.2894.1	0.428509	0.91444	1.23032	0.392304	1.15302	0.873946	1
Os01t0704400-01	13.3686	13.5711	10.4741	15.1887	13.668	11.814	7
MSTRG.2896.1	15.4756	27.5969	21.0471	11.931	9.24557	15.35	5
Os01t0705000-01	5.81282	7.78219	9.09654	4.56145	3.14422	13.065	3
Os01t0705100-00	3.07916	6.33011	15.9231	2.11554	5.12964	15.9678	3
Os01t0705400-00	6.98005	4.58322	7.19415	12.6483	7.5849	9.17268	7
MSTRG.2903.1	2.90012	3.76993	3.67338	3.28265	4.06389	3.04506	4
MSTRG.2907.1	6.04826	4.68811	4.45239	5.11422	3.31643	4.18296	8
Os01t0706100-01	2.29829	2.45228	1.75967	1.40274	1.20492	1.33925	5
Os01t0706200-01	1.599	3.67463	4.34003	1.48084	3.87806	3.52589	1
Os01t0706400-01	3.38281	6.08961	4.32916	2.51171	3.91226	7.97821	3
Os01t0706600-00	9.62459	9.47653	12.706	3.33488	3.53426	19.548	3
Os01t0706850-00	86.1935	162.99	121.163	42.5615	145.043	102.479	1
Os01t0706900-01	0.702205	2.43507	1.3441	0	2.30279	6.29123	6
Os01t0707300-02	4.97019	5.38003	4.65363	5.27945	9.99498	6.40463	4
MSTRG.2920.1	0.945211	1.10583	0.182059	1.28515	0.366787	0.334117	2
MSTRG.2923.1	145.548	138.746	112.341	163.815	169.7	144.048	9
Os01t0708500-03	1.6172	3.082	1.66491	3.26664	2.34796	4.27764	6
Os01t0708600-01	329.687	318.857	312.342	307.385	429.436	309.236	4
MSTRG.2928.1	1.14689	1.46984	0.374604	1.76288	1.28584	1.10072	7
MSTRG.2929.1	0.762797	1.0689	0.981622	1.32153	1.38434	3.42282	6
MSTRG.2931.1	6.42764	6.37599	1.23032	5.49226	6.05334	0.374548	2
Os01t0709500-01	6.28934	7.3284	5.65321	4.3944	13.722	3.55954	4
Os01t0710100-00	5.12858	9.2626	21.1724	7.38823	5.08611	2.93721	1
Os01t0710200-01	18.2485	19.6048	20.3524	18.8218	21.6389	20.075	4
Os01t0710250-01	1.27642	2.23094	2.02093	0.903891	1.85741	2.25596	3
MSTRG.2941.1	11.3044	15.4082	6.25567	12.0953	8.92511	4.3371	5
MSTRG.2942.2	0.43896	0.468372	0.980254	0.827241	1.44427	0.789374	4
MSTRG.2945.1	36.8339	31.5116	52.3271	44.6355	75.7951	26.0353	9
Os01t0711500-01	88.2474	94.2133	99.5941	89.0897	112.542	126.42	6
MSTRG.2948.1	4.87653	4.41053	2.52974	5.12106	6.802	2.63269	9
Os01t0711900-01	0	1.23563	4.47878	0	2.49615	4.99398	3
MSTRG.2952.1	0	0.499745	3.15144	0	1.22412	3.67442	3
Os01t0712700-01	111.426	201.627	496.317	86.0643	147.872	339.399	1
MSTRG.2956.1	0	0.481702	0.864131	0	0.197236	2.12701	6
Os01t0713200-01	0	0.283041	5.33138	0	1.39071	4.5826	3
MSTRG.2958.1	0.688641	1.48931	0.659067	2.52183	2.71892	3.00962	4
MSTRG.2960.16	2.13003	3.55217	1.99736	3.94524	2.12076	1.70895	7
Os01t0714100-01	126.55	148.759	91.2085	122.003	111.24	105.892	5
MSTRG.2963.2	5.39959	5.6554	1.98744	6.73989	5.35488	2.35539	7
Os01t0715000-01	2.08608	1.44941	1.41229	2.40939	0.360559	2.23501	2
Os01t0715400-02	4.55593	3.82807	3.07802	8.66522	6.64411	4.30386	7
Os01t0715400-03	3.34467	3.52398	1.76473	4.72738	4.19022	2.32334	7
MSTRG.2967.1	333.347	337.71	70.8263	223.394	147.165	65.7151	5
MSTRG.2969.1	0.518786	0.775436	0.356059	1.02719	0.358669	0.653444	7
Os01t0715700-00	20.4937	14.048	8.82532	13.8872	7.92019	11.1872	8
Os01t0715800-01	48.8702	45.446	66.1851	32.751	69.6334	89.214	3
Os01t0715900-01	9.664	8.02398	6.39857	11.9334	5.71303	6.87516	2
Os01t0716200-02	0.472658	1.10739	0.904719	1.08181	1.8585	0.424986	9
Os01t0716450-00	0.283142	1.00306	0.266331	0.481215	0.274681	1.00086	6
MSTRG.2978.1	4.78878	5.42892	6.36827	2.25617	2.76117	4.18574	1
Os01t0717650-00	3.28064	6.02065	14.0243	0.759551	5.63473	9.1595	1
Os01t0717700-01	23.3365	92.7664	91.8006	16.7648	69.4424	162.283	3
MSTRG.2991.1	0.988022	0.87504	0	0.666765	1.19812	0.636587	9
Os01t0718900-01	2.29813	3.6068	3.78547	4.32274	4.2195	3.69067	9
Os01t0719150-01	1.59704	0.383763	0.521633	0	0	0.418022	8
Os01t0719300-01	0.952341	3.68665	1.70239	1.78086	1.45713	1.92058	5
MSTRG.2999.2	1.58629	2.5709	1.96358	11.7235	2.33165	3.01603	7
Os01t0720200-01	33.2298	58.0914	46.3464	51.6073	54.1224	76.7811	6
MSTRG.3006.4	4.00648	2.52326	2.96026	6.05265	7.06364	5.35399	9
Os01t0720400-01	3.17402	25.964	61.1354	2.45201	25.7542	87.9721	3
Os01t0720500-01	18.0171	13.8293	68.2495	17.6072	47.35	122.365	6
MSTRG.3010.5	1.20261	1.09552	0.734428	2.18989	0.737699	0.265181	2
Os01t0720700-00	19.3818	25.283	19.8961	20.0023	12.0967	24.8956	5
MSTRG.3012.1	5.73371	5.70677	2.85313	5.40486	6.90471	7.11783	4
MSTRG.3013.8	3.18136	2.86305	2.20854	3.22334	5.22297	5.25581	4
Os01t0720801-01	7.8878	8.59152	7.54904	8.35412	9.61766	12.0985	6
Os01t0721500-01	1.69383	1.55763	1.30243	2.36735	1.28058	2.54136	6
MSTRG.3017.1	59.433	53.7713	34.9439	44.6324	34.6036	63.2004	6
Os01t0721900-01	347.851	162.27	219.697	329.085	231.56	152.859	8
MSTRG.3019.1	4.81118	4.44116	2.3731	5.61919	4.27664	3.91334	7
MSTRG.3022.1	0	0.545838	0.741934	0	1.3232	2.72321	6
Os01t0722700-01	2.24967	0.973062	0.724816	2.47152	1.31048	1.34851	2
Os01t0722800-00	164.029	199.38	168.122	233.365	270.918	185.549	9
Os01t0723200-01	761.711	582.071	525.92	772.928	558.2	379.293	2
Os01t0723400-02	0.13877	0.400152	0.135977	1.04607	0.363763	0.623867	7
Os01t0723600-01	7.12167	11.6091	11.2796	8.07963	6.20262	6.77936	1
Os01t0724500-01	0.269436	0.46801	0.36482	1.42261	0.41225	0.169686	7
MSTRG.3037.1	0.981992	1.14944	0.634595	1.37389	0.462895	0.441902	2
MSTRG.3038.1	6.60694	4.11925	1.53807	11.9463	1.44144	0.701091	2
Os01t0725900-01	4.87974	4.0203	3.36898	4.78655	4.26382	2.82058	2
MSTRG.3041.1	5.62346	4.68861	2.31573	6.13003	7.15394	7.42306	9
MSTRG.3044.1	4.31274	1.78254	2.77902	2.48591	2.51226	3.38656	8
MSTRG.3045.1	11.9642	6.48228	6.61989	11.08	7.85156	5.97466	8
MSTRG.3048.1	2.29289	7.42655	3.08109	1.47367	6.7512	4.78371	4
Os01t0727200-00	1.20685	1.68748	1.9108	0.341852	1.56105	4.49268	6
Os01t0727500-02	2.31085	2.28081	4.0031	2.31025	2.10126	3.00311	1
Os01t0727820-00	0.177046	0.377816	0.338884	0	0.618797	1.52927	6
MSTRG.3055.1	0	0	0.744532	0	0.383937	2.03993	6
Os01t0727900-01	1.58174	0.747127	0.253885	3.58433	0.905581	0	2
Os01t0728000-01	4.31761	4.65403	2.05152	10.3825	3.7887	1.78104	7
MSTRG.3058.1	0.41387	0.596711	0.700055	0.189451	1.14843	2.98446	6
Os01t0728100-01	4.7926	10.2285	8.89556	4.37909	12.9016	8.43907	4
MSTRG.3059.1	6.01358	20.321	10.312	5.66643	18.2038	9.80028	4
MSTRG.3060.1	25.8193	17.2711	18.6419	26.4361	22.796	10.404	2
Os01t0728700-01	0	0.709744	1.38314	0.337094	2.1187	2.52827	3
MSTRG.3065.6	1.51532	1.71087	1.10044	1.91183	1.61511	1.39172	7
MSTRG.3066.1	5.88594	5.58479	3.42888	7.95752	4.91941	5.52238	7
Os01t0729200-01	9.16185	5.869	4.6198	10.1808	22.1428	18.0164	4
Os01t0729400-01	99.0444	35.2433	31.9587	77.0181	23.3281	18.2229	8
Os01t0729500-01	58.3747	88.48	71.3856	59.4282	67.3842	124.314	6
Os01t0730100-01	7.89867	6.77454	10.558	5.77497	6.06923	24.2468	6
Os01t0730200-01	13.8489	21.759	17.5022	9.21074	12.256	24.5849	3
MSTRG.3073.1	0	1.39248	0	0	0.843901	0	5
Os01t0730500-01	6.90973	3.1585	2.32918	8.66976	3.89222	3.61249	2
Os01t0730600-00	14.2186	4.68811	3.36403	13.2961	3.83915	3.16046	8
Os01t0730700-01	0.79202	1.54435	2.04874	1.34608	1.37456	4.8994	6
MSTRG.3079.1	0.751059	1.20091	0.601388	1.48708	0.796223	0.551837	7
Os01t0731000-01	133.233	151.492	155.786	177.121	170.934	140.965	9
Os01t0731100-01	0.263226	0.59017	1.08396	0	2.45679	5.80152	6
Os01t0731800-02	19.0366	22.3557	16.7498	28.5459	22.8312	13.6196	7
Os01t0731800-01	1.64799	2.80231	1.55014	3.08093	1.41526	1.98203	7
MSTRG.3088.1	2.95074	4.46977	2.59615	3.28635	8.03264	7.31715	4
Os01t0732000-01	183.118	294.661	310.373	184.872	306.627	297.544	3
MSTRG.3090.1	0.902076	1.50767	1.22421	0.657055	0.553349	1.93599	3
Os01t0732300-01	61.1481	65.9425	70.3955	48.0151	48.6517	53.6652	1
MSTRG.3092.7	0.586101	0.532693	0.412535	1.39256	0.699475	0.592062	7
MSTRG.3092.8	1.28054	1.13862	0.906226	3.48579	1.57925	1.15139	7
MSTRG.3093.1	1.99702	1.70361	0.841423	7.7492	3.71341	1.71559	7
Os01t0733001-00	4.60003	4.88881	8.34477	4.74665	3.10391	6.77444	1
Os01t0733200-01	16.4505	16.749	29.5574	18.4173	12.1312	30.7096	3
Os01t0733500-01	0.981453	1.94706	3.02463	2.83566	9.10285	3.02982	4
Os01t0734000-01	0	0.59227	3.45306	0	3.56133	4.36662	3
MSTRG.3102.1	3.44768	2.44275	2.22955	3.2961	2.35065	3.70226	8
Os01t0734100-01	1.50785	1.58126	1.06374	1.74552	2.99072	2.33187	4
MSTRG.3104.1	2.51779	4.53764	3.9474	5.21938	10.1894	7.26243	4
Os01t0734333-00	5.6208	4.64637	5.50769	6.47979	9.24678	10.6448	6
Os01t0734399-00	5.13898	7.20786	9.08436	6.21809	11.008	9.61341	4
Os01t0734466-01	14.4943	43.6945	26.0864	16.2954	38.8432	69.2754	3
Os01t0734501-00	24.922	45.1812	34.0564	17.8328	36.4751	59.3845	3
MSTRG.3111.1	5.30212	8.4332	4.53167	6.37494	3.02419	6.81678	5
Os01t0736300-01	0.759335	0.995383	1.07138	0.967899	1.50609	1.9046	6
MSTRG.3119.1	0.32991	1.16903	1.00508	0.522571	0.839396	0.727123	1
MSTRG.3122.1	1.43758	4.6017	2.75168	1.31612	6.28064	7.5393	4
Os01t0736900-01	7.7753	8.29626	7.51531	26.2795	28.205	9.67942	9
MSTRG.3124.1	2.19172	3.50785	1.0488	2.34096	2.16336	3.19287	5
MSTRG.3125.1	4.93828	2.50904	1.74628	6.72643	3.28142	1.19127	2
Os01t0737500-01	0.977778	0.617139	1.32392	0	0.29921	0.92368	1
Os01t0737700-00	0	2.15201	4.64264	0.70322	6.26149	45.3365	6
Os01t0737900-01	36.1924	23.9706	23.3567	36.6789	29.3563	22.6123	2
Os01t0738000-01	113.167	95.4754	74.048	111.097	76.0439	111.961	8
MSTRG.3133.1	4.29295	3.50739	2.76627	6.33737	4.33175	3.59576	7
Os01t0738400-01	0	2.30179	0.617244	0	0.83699	2.7909	3
Os01t0738500-01	16.2381	16.1575	14.0065	16.907	15.231	15.6243	2
MSTRG.3140.1	15.4893	10.4308	15.0036	13.2111	6.56292	8.84691	8
MSTRG.3141.1	0.84312	1.07953	0.977914	0.145795	1.16509	1.1917	3
Os01t0739300-01	98.8428	100.91	107.721	104.233	124.633	83.7363	9
Os01t0739400-01	2.48994	1.23687	1.36943	3.22953	1.57561	1.71938	2
Os01t0739500-01	19.9119	71.8033	128.796	31.6515	85.0522	83.2311	1
Os01t0739700-01	372.321	132.185	69.3581	393.669	114.376	78.5089	2
Os01t0740350-00	11.7395	20.6402	29.8557	10.4693	42.5673	16.435	4
Os01t0740400-01	4.76319	9.35744	8.96597	3.11703	9.66181	12.5321	3
MSTRG.3149.2	8.98419	8.41331	18.8663	6.02124	10.558	14.1159	1
Os01t0741250-00	330.935	162.998	174.136	256.131	122.928	54.1193	8
Os01t0742000-01	29.4549	28.4255	28.6615	37.1136	39.7874	33.6589	9
Os01t0742100-01	31.8994	15.7125	22.8503	29.6731	32.1021	20.7676	9
Os01t0742400-02	0.0863662	1.28508	0.82657	0.244141	0.170497	1.15292	3
Os01t0742500-01	4.77703	4.88225	7.37596	8.76125	13.2921	6.8326	9
MSTRG.3161.3	0.469105	1.00107	0	0	0.819789	0.421791	5
MSTRG.3161.4	1.51068	0.544517	0	1.38304	0.762164	1.77938	8
Os01t0742766-01	1.58357	1.19939	0	0.761593	0	1.30646	8
MSTRG.3162.1	2.57388	3.57449	2.98538	3.39542	3.11657	3.23999	5
MSTRG.3163.1	1.76828	2.63111	2.84859	2.42074	2.96143	3.47762	3
Os01t0743200-01	0.695293	3.70939	3.54897	1.31031	2.28765	1.8755	1
Os01t0743200-02	0.636709	2.41121	3.23292	0.816576	1.10049	2.10117	1
MSTRG.3166.2	0.822285	0.670694	0.879899	1.09997	1.0873	0.96888	9
MSTRG.3168.2	2.98911	1.7521	1.04027	3.75918	1.09677	1.28028	2
MSTRG.3169.2	1.3982	1.23156	0.70296	3.53822	0.725	0.366864	7
Os01t0743666-00	2.60505	2.81694	0	3.57742	0	1.0228	2
Os01t0743732-00	5.62603	7.86661	3.16062	6.3745	2.27413	3.31451	5
MSTRG.3172.2	8.20217	8.10084	6.59687	15.1358	13.0652	11.3436	9
Os01t0744000-01	261.776	170.888	189.303	447.664	259.294	85.4568	7
MSTRG.3176.1	2.27565	1.46819	1.32054	4.82348	3.33154	1.6379	7
Os01t0744400-01	1.07666	1.37145	0.601445	1.03561	1.31787	2.19719	6
Os01t0745400-01	282.511	323.811	228.935	269.932	225.425	261.741	5
Os01t0745700-01	3.44411	4.41817	2.96774	6.37919	4.20312	0.934339	7
Os01t0745700-02	3.83354	1.5339	1.40865	4.5153	3.31094	1.25655	2
Os01t0746000-00	8.33076	6.4976	4.81381	4.62907	1.65235	1.92883	8
Os01t0746200-01	40.9621	15.6847	27.1933	67.0191	35.4387	12.4697	7
Os01t0746200-02	2.03451	2.24509	1.08304	3.26144	2.30721	2.52779	7
Os01t0746400-01	15.28	3.68233	1.39676	6.01644	3.60138	2.72179	8
MSTRG.3187.1	4.59626	5.56992	5.54595	0.884203	0	4.22092	1
Os01t0747300-01	5.67917	8.95412	11.2746	7.0109	18.8339	14.1763	4
Os01t0747400-01	10.9083	24.9346	27.2758	5.7532	24.1091	25.3913	3
Os01t0747600-01	16.442	15.4933	9.86225	14.3442	9.24678	13.0559	8
Os01t0747800-01	120.136	148.81	160.777	69.0807	146.381	141.717	1
Os01t0748200-00	28.2159	29.9413	24.1957	27.7138	34.5163	26.2412	9
Os01t0748300-00	0.639251	5.52997	3.05899	1.2047	3.87017	2.29911	5
Os01t0748500-01	1.38378	0.664826	0.993866	1.52116	1.02503	0	2
Os01t0748900-01	0.71616	1.11714	0.689704	3.05088	3.07513	1.10742	9
Os01t0749100-01	51.8245	60.15	57.4664	39.4958	77.1136	72.0892	4
MSTRG.3205.1	5.50869	5.55789	8.39119	5.82852	2.85638	6.8171	1
MSTRG.3206.1	2.60782	1.97515	1.49841	4.42579	3.42007	3.25016	7
Os01t0749400-02	86.4534	149.718	170.293	101.523	154.093	136.455	1
Os01t0750000-01	5.1087	4.88845	5.03288	2.21327	9.75751	7.66644	4
Os01t0750400-00	15.8993	6.23827	1.99838	16.9206	4.12206	3.93512	2
Os01t0750500-01	10.2299	3.91786	3.19523	8.22321	3.08671	3.08774	8
Os01t0750600-01	2.36928	2.27732	2.19262	2.27613	1.03938	2.68734	5
Os01t0750800-02	3.33541	3.04203	2.32773	4.5502	3.75764	4.15939	7
Os01t0750900-01	13.8001	19.6208	18.9303	19.1433	17.2925	28.4556	6
MSTRG.3222.1	8.15036	10.4124	6.67481	12.6671	8.54757	5.21574	7
Os01t0751400-00	24.2019	12.0876	1.91048	10.3529	2.30938	1.36336	8
Os01t0751600-01	60.0877	36.8649	24.6074	57.5609	27.3628	35.1747	8
Os01t0752200-01	50.1499	98.8904	144.743	48.8084	214.565	162.204	4
Os01t0752300-01	2.93979	2.47399	1.32684	6.28377	3.38743	1.07794	7
Os01t0752500-01	2.74807	5.04327	7.10851	3.70906	1.77	10.6236	3
Os01t0752800-01	773.168	633.767	571.308	837.513	758.482	693.525	7
Os01t0753100-01	32.1032	18.9932	20.5536	41.0982	25.9231	18.6024	2
MSTRG.3240.1	5.47234	8.5094	2.33044	6.09358	7.32266	4.37701	5
MSTRG.3243.1	9.42536	10.5019	6.71947	13.9435	16.8737	7.0455	9
MSTRG.3243.4	2.82514	2.14381	1.60269	2.31418	1.81893	2.13911	8
MSTRG.3245.1	3.85508	2.50565	1.22074	4.36795	1.86995	2.47936	2
MSTRG.3247.1	13.1812	15.9809	14.6279	11.8188	11.944	37.185	6
MSTRG.3248.1	10.2027	8.91518	13.7464	9.6137	11.0761	7.5057	1
Os01t0753800-01	219.614	949.733	998.131	224.107	787.228	1325.66	3
Os01t0754000-01	1.5019	1.41884	0	2.70282	2.91405	0	9
Os01t0754100-01	131.122	85.955	77.9922	107.26	131.943	87.217	9
Os01t0754700-01	7.30086	4.38373	4.46701	6.79199	4.14449	2.97653	8
Os01t0755500-01	54.8401	18.589	10.6389	43.7522	15.0774	5.25346	8
Os01t0755700-01	27.0717	23.9694	21.2562	29.3303	18.081	21.2382	2
MSTRG.3261.1	9.54963	11.4834	8.84936	6.02875	11.9302	7.97492	4
Os01t0756600-01	2494.9	2484.34	2384.97	2180.16	2045.78	775.923	5
Os01t0756900-01	14.3823	3.8681	1.43286	4.59291	1.92449	1.91376	8
[truncated: 22,549 more rows]
